# Supplementary material for: Enhanced β2-microglobulin binding of a “navigator” molecule bearing a single-chain variable fragment antibody for artificial switching of metabolic processing pathways
Source: Royal Society of Chemistry journal article supplement (doi:10.1039/d1bm00385b), 2021-01-01
Supplement: d1bm00385b1.pdf [file d1bm00385b1.pdf]

Electric Supplementary Information for  
**Enhanced  $\beta$ 2-microglobulin binding of a “navigator” molecule bearing a single-chain variable fragment antibody for artificial switching of metabolic processing pathways**

Yusuke Kambe,<sup>a</sup> Ken Kuwahara,<sup>a,b</sup> Mitsuru Sato,<sup>c</sup> Takahiko Nakaoki<sup>b</sup> and Tetsuji Yamaoka<sup>\*a</sup>

<sup>a</sup> Department of Biomedical Engineering, National Cerebral and Cardiovascular Center (NCVC) Research Institute, 6-1 Kishibe-Shimmachi, Suita, Osaka 564-8565, Japan

<sup>b</sup> Department of Materials Chemistry, Ryukoku University, Seta, Otsu 520-2194, Japan

<sup>c</sup> Animal Bioregulation Unit, Division of Animal Sciences, Institute of Agrobiological Sciences, National Agriculture and Food Research Organization (NARO), 1-2 Owashi, Tsukuba, Ibaraki, 305-8634, Japan

\*Correspondence to:

Tetsuji Yamaoka

Department of Biomedical Engineering, NCVC Research Institute, 6-1 Kishibe-Shimmachi, Suita, Osaka 564-8565, Japan

Tel: +81-6-6170-1070 (ext. 31009); Fax: +81-6-6170-1702; E-mail: yamtet@ncvc.go.jp

**Table S1.** Primer sequences for the construction of the plasmid pCAG[V<sub>H</sub>-linker-V<sub>L</sub>].

| Primer name | Sequence (5'–3')                                                     |
|-------------|----------------------------------------------------------------------|
| VH-IgG1-5   | AAGCAGTGGTATCAACGCAGAGTACGCG                                         |
| VH-IgG1-3   | CCCTGGGCACAATTTTCTTGTCACC                                            |
| VL-kappa-5  | AAGCAGTGGTATCAACGCAGAGTACGCG                                         |
| VL-kappa-3  | CCTGTTGAAGCTCTTGACAATGGGTG                                           |
| #1          | CGAAT <u>GCGGCCG</u> CGCCACC <b>ATGGACGTT</b> CAGCTGCAGCAG <b>TC</b> |
| #2          | CAGAACCACCACCCCC <b>GGCTGAGGAGACGGT</b> GA <b>CTGAGG</b>             |
| #3          | GGTGGAGGAGGTTCT <b>GACATTCAGATGACCCAGTC</b>                          |
| #4          | CTAGT <u>TCTAGA</u> <b>CCGTTTGATTTCAGCTTGGTGCC</b>                   |
| #5          | <b>TCTGAATGTC</b> AGAACCTCCTCCACCTGATCCTCCACCTCCA<br>GAACCACCACCCCC  |
| #6          | <b>CTCCTCAGCC</b> GGGGGTGGTGGTTCTGGAGGTGGAGGATCA<br>GGTGGAGGAGGTTCT  |

NotI (GCGGCCGC) and XbaI (TCTAGA) recognition sites are underlined; sequences matching the cDNA of V<sub>H</sub> or V<sub>L</sub> are shown in red.

**Table S2.** Primer sequences for the construction of the plasmid pET[ApoE NTD–(GGGS)<sub>3</sub>–scFv].

| Primer name   | Sequence (5'–3')                                   |
|---------------|----------------------------------------------------|
| GGGSx1-26VH-5 | <u>GGGATCC</u> GGTGGAGGTGGTAGC <b>GAGGTCAGCTGC</b> |
| 26VL-3        | GAAGCTT <i>ATTACCGTTTGATTCC</i>                    |

BamHI (GGATCC) and HindIII (AAGCTT) recognition sites are underlined; sequences matching the cDNA of scFv are in red; stop codon is italicized.

**Table S3.** Amino acid sequences of the navigator proteins.

| Navigator<br>name       | protein | Sequence (N–C)                                                                                                                                                                                                                                                                                                                                                                                                                                                                                                                                                                                                                                                               |
|-------------------------|---------|------------------------------------------------------------------------------------------------------------------------------------------------------------------------------------------------------------------------------------------------------------------------------------------------------------------------------------------------------------------------------------------------------------------------------------------------------------------------------------------------------------------------------------------------------------------------------------------------------------------------------------------------------------------------------|
| ApoE NTD–scFv           |         | MHHHHHHSSGLVPRGSGMKETAAAKFERQHMDSPDLGTD<br>DDDKAMEGEPEVTDQLEWQSNQPWEQALNRFWDYLRWV<br>QTLSDQVQEELQSSQVTQELTALMEDTMTEVKAYKKELEE<br>QLGPVAEETRARLGKEVQAAQARLGADMEDLRNRLGQYR<br>NEVHTMLGQSTEEIRARLSTHLRKMRKRLMRDAEDLQKRL<br>AVYKAGAREGAERGVSAIRERLGPLVEQGRQRGGGGSGG<br>GGSGGGGS <b>EVQLQQSGAELVKPGASVKLSCTASAFNIKN</b><br><b><u>TYIHVKQRPEQGLEWIGRIDFANGNTKYDPKFQGKAT</u></b><br><b><u>LTADTSSNTAYLQLSSLTSED</u></b> <b><u>TAVYYCARAAYYKYDGA</u></b><br><b><u>MDYWGGQTSVT</u></b> <b><u>VSSAGGGSGGGSGGGSDIQMTQSPA</u></b><br><b><u>SQSASLGESVTITCLASQTIGTWLAWYQQKPGKSPQLLIYAATSL</u></b><br><b><u>ADGVPSRFSGSGSGTKFSFKISLQAEDFVSYYCQQLYSSPWF</u></b><br><b><u>GGGTKLEIKR</u></b> |
| ApoE NTD–MHC $\alpha$ 3 |         | MHHHHHHSSGLVPRGSGMKETAAAKFERQHMDSPDLGTD<br>DDDKAMEGEPEVTDQLEWQSNQPWEQALNRFWDYLRWV<br>QTLSDQVQEELQSSQVTQELTALMEDTMTEVKAYKKELEE<br>QLGPVAEETRARLGKEVQAAQARLGADMEDLRNRLGQYR<br>NEVHTMLGQSTEEIRARLSTHLRKMRKRLMRDAEDLQKRL<br>AVYKAGAREGAERGVSAIRERLGPLVEQGRQRGGGGSGG<br>GGSGGGGS <b>RTDSPKAHVTHHPRSKGEVTLRCWALGFYPAD</b><br><b>ITLTWQLNGEELTQKMELVETRPAGDGTQKQWASVVVPLG</b><br><b>KEQNYTCRVYHEGLPEPLTLRW</b>                                                                                                                                                                                                                                                                      |

Sequences of ApoE NTD are denoted in blue; sequences of scFv and MHC  $\alpha$ 3 are denoted in red; sequences of V<sub>H</sub> and V<sub>L</sub> are in bold and italicized, respectively; sequences of complementary determining regions in scFv are underlined.

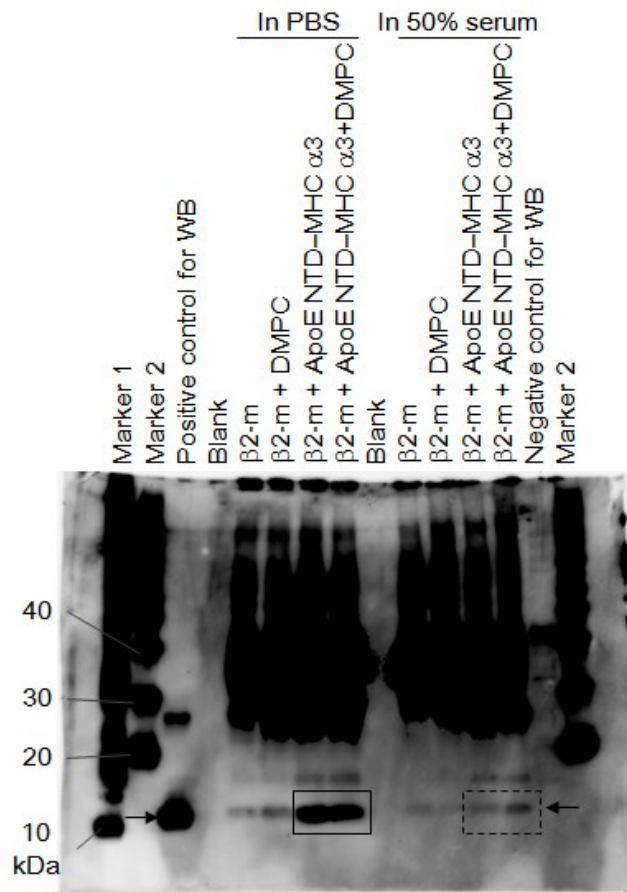

**Fig. S1.** IP assay for characterizing the ApoE NTD-MHC  $\alpha 3$  binding to  $\beta 2$ -m in PBS and 50% (v/v) serum. ApoE NTD-MHC  $\alpha 3$  or ApoE NTD-MHC  $\alpha 3$ +DMPC (ApoE NTD-MHC  $\alpha 3$ : 8  $\mu$ M, DMPC: 0 or 0.04 mg/mL) and human  $\beta 2$ -m (5  $\mu$ M) were mixed in PBS or PBS containing 50% (v/v) murine serum and incubated at RT o/n. Magnetic beads conjugated with mouse anti-MHC class I H2-D<sup>b</sup> MAb (ab25228; Abcam, UK) were added to the solution of ApoE NTD-MHC  $\alpha 3$  and  $\beta 2$ -m. Then, an IP assay was performed as recommended by the manufacturer (Tamagawa Seiki). The resultant immunocomplexes were separated by SDS-PAGE under reducing conditions and were transferred to a polyvinylidene fluoride membrane. Then, the membrane was blocked with EzBlock Chem and was probed with the rabbit anti- $\beta 2$ -m PAb, followed by incubation with the HRP-conjugated goat anti-rabbit IgG PAb. Immunoactive proteins were detected using a Chemi-Lumi one super kit (Nacalai Tesque) and a chemiluminescence imaging system. As the positive and negative controls for WB,  $\beta 2$ -m and ApoE NTD-MHC  $\alpha 3$  were run on the gel, respectively. Novex<sup>®</sup> sharp protein standard and MagicMark<sup>™</sup> XP Western protein standard (Invitrogen) were used as markers 1 and 2, respectively. Arrows indicate the positions of bands derived from  $\beta 2$ -m.

Compared to PBS (solid box), the band derived from  $\beta 2$ -m captured by ApoE NTD-MHC  $\alpha 3$  or ApoE NTD-MHC  $\alpha 3$ +DMPC in 50% (v/v) serum was thinner and brighter (dashed box), indicating that the ApoE NTD-MHC  $\alpha 3$  binding to  $\beta 2$ -m was reduced by serum components.

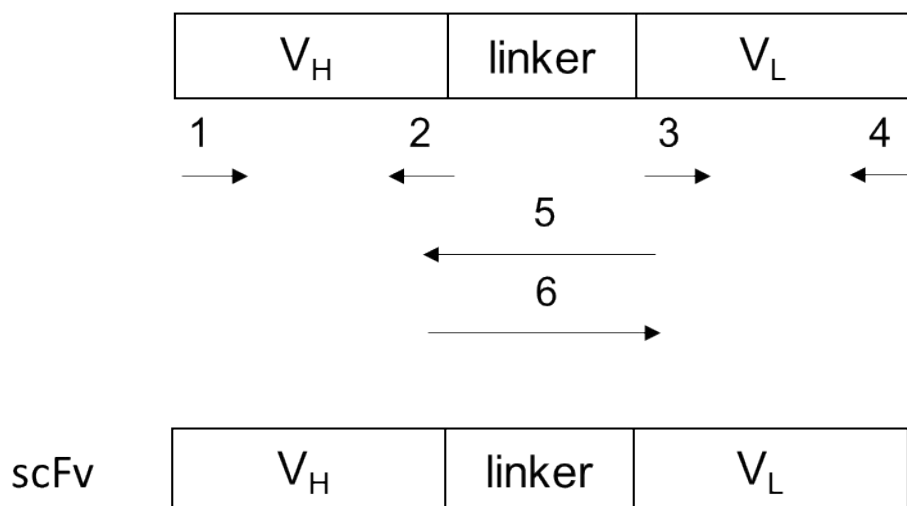

**Fig. S2.** Construction of cDNA encoding anti-β2-m scFv by cloning the  $V_H$  and  $V_L$  from hybridoma cells that produce anti-β2-m MAb. The arrows represent the primers used to amplify the antibody fragments.

A four-step PCR was performed for generating appropriate cDNA fragments encoding the  $V_H$  and  $V_L$  regions. Primer sequences (Sigma-Aldrich, MO) are listed in Table S1. Total RNA from hybridoma cells was reverse-transcribed using a SMART<sup>TM</sup> RACE cDNA amplification kit (Clontech, CA). The cDNA fragments for the  $V_H$  and  $V_L$  regions were generated by PCR using isotype-specific primers ( $V_H$ , sense primer VH-IgG1-5 and reverse primer VH-IgG1-3;  $V_L$ , sense primer VL-kappa-5 and reverse primer VL-kappa-3). The second PCR amplification was performed using the following primer sets:  $V_H$ , sense primer #1 and reverse primer #2;  $V_L$ , sense primer #3 and reverse primer #4. The third PCR products were amplified using the following primer sets:  $V_H$ -linker, sense primer #1 and reverse primer #5; linker- $V_L$ , sense primer #6 and reverse primer #4. The third PCR products,  $V_H$ -linker and linker- $V_L$ , were mixed and then the fourth PCR amplification was performed with the following primer sets: sense primer #1 and reverse primer #4. The fourth PCR product was treated with NotI and XbaI and cloned into the pCAGGS-MCS vector, which was designated as pCAG[ $V_H$ -linker- $V_L$ ].

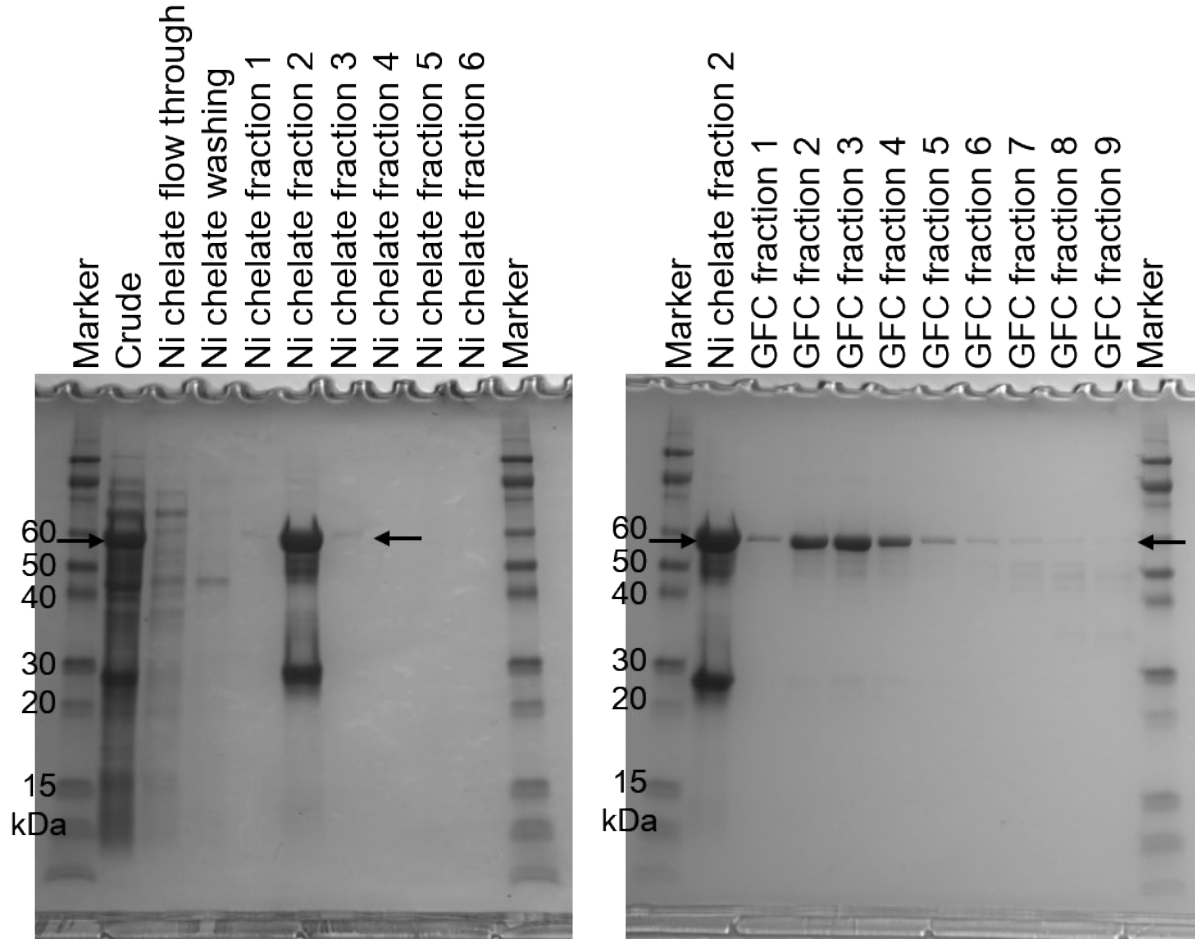

**Fig. S3.** Purification of ApoE NTD-scFv. *E. coli* cells transformed with pET[ApoE NTD-(GGGGS)<sub>3</sub>-scFv] were resuspended and lysed in 100 mM NaH<sub>2</sub>PO<sub>4</sub>, 10 mM Tris, 8 M urea, and 5 mM imidazole (pH 8.0). After centrifugation and filtration, ApoE NTD-scFv with an N-terminal His tag was first purified on the Ni-chelate column. The fusion protein was further purified on the gel filtration column (GFC). Proteins in solutions obtained in the purification process were analyzed by SDS-PAGE on Mini-PROTEAN® TGX™ gels under reducing conditions. Separated proteins were fixed and visualized using the EzStain aqua solution (Atto, Japan). Novex® sharp protein standard was used as the marker. Arrows indicate the position of bands derived from ApoE NTD-scFv. The intensity of protein bands was determined using the ImageJ software, which revealed that the purity of ApoE NTD-scFv was 90%.

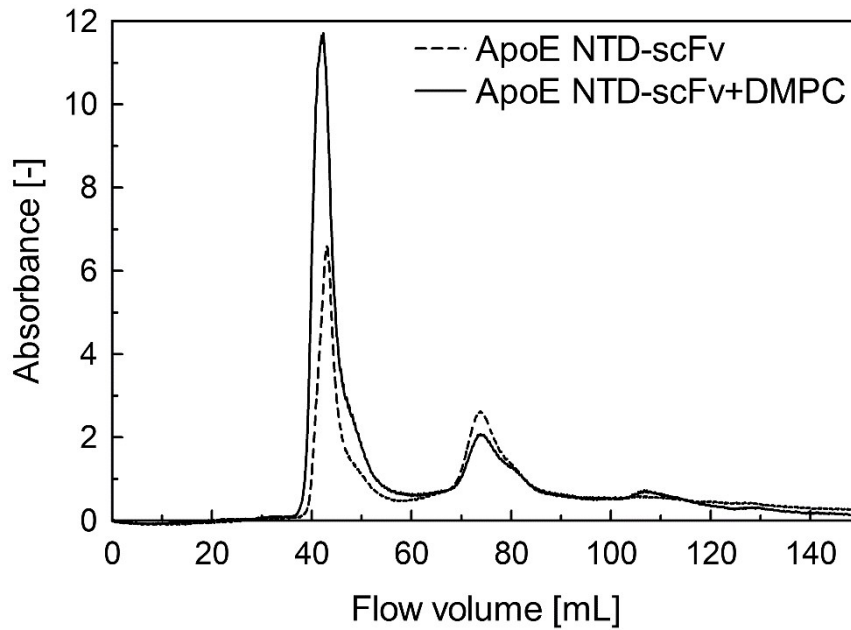

**Fig. S4.** Gel filtration chromatographs of ApoE NTD–scFv and ApoE NTD–scFv+DMPC. ApoE NTD–scFv (37.5  $\mu$ M) or ApoE NTD–scFv+DMPC (ApoE NTD–scFv: 37.5  $\mu$ M; DMPC: 0.8 mg/mL) was loaded onto a GFC (HiLoad 16/600 Superdex 200 pg; GE Healthcare) at a volume of 600  $\mu$ L and run at a flow speed of 1 mL/min, while absorbance at 280 nm was detected.

Both ApoE NTD–scFv and ApoE NTD–scFv+DMPC showed two peaks. The peaks at 42 mL and 74 mL in the ApoE NTD–scFv+DMPC group were higher and lower, respectively, than those in the ApoE NTD–scFv group. These results suggested that the apparent MW of ApoE NTD–scFv+DMPC was larger than that of ApoE NTD–scFv due to the formation of the complex of ApoE NTD–scFv and DMPC.

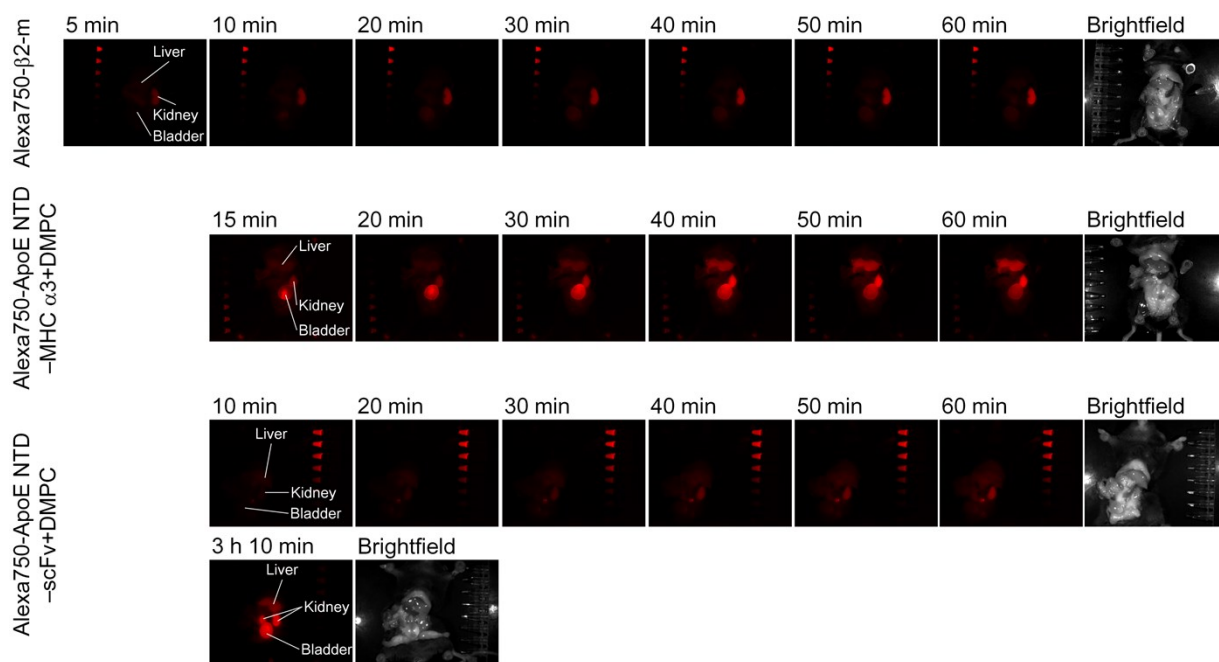

**Fig. S5.** Time-dependent changes in the body distribution of Alexa750- $\beta$ 2-m, Alexa750-ApoE NTD-MHC  $\alpha$ 3+DMPC, and Alexa750-ApoE NTD-scFv+DMPC after intravenous injection. Alexa750- $\beta$ 2-m (12.5  $\mu$ M), Alexa750-ApoE NTD-MHC  $\alpha$ 3+DMPC (ApoE NTD-MHC  $\alpha$ 3: 12.5  $\mu$ M; DMPC: 0.8 mg/mL), or Alexa750-ApoE NTD-scFv+DMPC (ApoE NTD-scFv: 12.5  $\mu$ M; DMPC: 0.8 mg/mL) were injected into anesthetized mice (C57Bl/6N; male; 9–16 weeks old; 24.7–28.1 g) intravenously (for the labeled protein concentration of approximately 1  $\mu$ M in the blood). After injection, the mice were laparotomized and observed until 60 min, except for a mouse with the Alexa750-ApoE NTD-scFv+DMPC injection (3 h and 10 min), using the Maestro *in vivo* imaging system (Cambridge Research & Instrumentation, MA).

The accumulation of Alexa750- $\beta$ 2-m in the kidney was observed at 5 min post-injection. In contrast, that of Alexa750-ApoE NTD-MHC  $\alpha$ 3+DMPC in the liver was obvious at 40 min. Alexa750-ApoE NTD-scFv+DMPC accumulated in the liver by 3 h and 10 min post-injection.
