# Supplementary material for: Enhanced β2-microglobulin binding of a “navigator” molecule bearing a single-chain variable fragment antibody for artificial switching of metabolic processing pathways
Source: Royal Society of Chemistry journal article supplement (doi:10.1039/d1bm00385b), 2021-01-01
Supplement: d1bm00385b2.xlsx [file d1bm00385b2.xlsx]

## Sheet: Fig2A
Absorbance at 450 nm [-]
Navigator concentration [nM]	ApoE NTD-MHC a3	ApoE NTD-scFv
0	-0.0036404	-0.010887
	-0.0056853	-0.0029453
	-0.0029423	-0.0068375
50	0.0137016	0.236828
	-0.008744	0.234535
	-0.0013501	0.218948
100	-0.0031508	0.630179
	0.0049032	0.639615
	0.0207331	0.7488
150	-0.0026128	0.814711
	-0.0032467	0.94056
	0.0161121	1.04624
200	-0.0120517	0.871276
	-0.003026	1.10656
	0.0244644	1.07274
300	0.0011809	1.02486
	0.0020557	1.0303
	0.0016445	1.03246
400	0.067648	0.969229
	0.0004219	1.00619
	0.001348	1.04221
500	0.0940057	1.1587
	0.0713071	0.978925
	0.0695286	1.01819
Two-Way ANOVA With Replication
0	ApoE NTD-MHC a3	ApoE NTD-scFv	Total
Mean	-0.00408933	-0.00688993
S.E.M.	0.000823037	0.00229272
S.D.	0.00142554	0.00397111
Variance	2.03217e-06	1.57697e-05
Sum	-0.012268	-0.0206698	-0.0329378
N	3	3	6
Sum(x^2)	5.42323e-05	0.000173953	0.000228185
Sum^2/N	5.01679e-05	0.000142414
50	ApoE NTD-MHC a3	ApoE NTD-scFv	Total
Mean	0.0012025	0.230103
S.E.M.	0.00660399	0.00561697
S.D.	0.0114384	0.00972888
Variance	0.000130838	9.46511e-05
Sum	0.0036075	0.69031	0.693918
N	3	3	6
Sum(x^2)	0.000266014	0.159032	0.159298
Sum^2/N	4.33802e-06	0.158843
100	ApoE NTD-MHC a3	ApoE NTD-scFv	Total
Mean	0.00749517	0.672865
S.E.M.	0.00701543	0.0380653
S.D.	0.0121511	0.065931
Variance	0.000147649	0.00434689
Sum	0.0224855	2.01859	2.04108
N	3	3	6
Sum(x^2)	0.00046383	1.36693	1.3674
Sum^2/N	0.000168533	1.35824
150	ApoE NTD-MHC a3	ApoE NTD-scFv	Total
Mean	0.00341753	0.933837
S.E.M.	0.00634992	0.0669211
S.D.	0.0109984	0.115911
Variance	0.000120964	0.0134353
Sum	0.0102526	2.80151	2.81176
N	3	3	6
Sum(x^2)	0.000276968	2.64303	2.6433
Sum^2/N	3.50386e-05	2.61616
200	ApoE NTD-MHC a3	ApoE NTD-scFv	Total
Mean	0.0031289	1.01686
S.E.M.	0.0109813	0.0734421
S.D.	0.0190202	0.127206
Variance	0.000361768	0.0161812
Sum	0.0093867	3.05057	3.05996
N	3	3	6
Sum(x^2)	0.000752907	3.13435	3.13511
Sum^2/N	2.937e-05	3.10199
300	ApoE NTD-MHC a3	ApoE NTD-scFv	Total
Mean	0.00162703	1.0292
S.E.M.	0.000252684	0.00226101
S.D.	0.000437661	0.00391619
Variance	1.91548e-07	1.53365e-05
Sum	0.0048811	3.08761	3.09249
N	3	3	6
Sum(x^2)	8.32481e-06	3.17781	3.17782
Sum^2/N	7.94171e-06	3.17778
400	ApoE NTD-MHC a3	ApoE NTD-scFv	Total
Mean	0.0231393	1.00588
S.E.M.	0.022256	0.0210681
S.D.	0.0385484	0.036491
Variance	0.00148598	0.00133159
Sum	0.0694179	3.01763	3.08704
N	3	3	6
Sum(x^2)	0.00457825	3.03802	3.0426
Sum^2/N	0.00160628	3.03536
500	ApoE NTD-MHC a3	ApoE NTD-scFv	Total
Mean	0.0782805	1.05194
S.E.M.	0.00787936	0.054571
S.D.	0.0136475	0.0945197
Variance	0.000186253	0.00893398
Sum	0.234841	3.15582	3.39066
N	3	3	6
Sum(x^2)	0.018756	3.33759	3.35635
Sum^2/N	0.0183835	3.31972
Sum Table
	ApoE NTD-MHC a3	ApoE NTD-scFv	T(B)	Sum(x^2)
0	-0.00408933	-0.00688993	-0.0109793	0.000228185
50	0.0012025	0.230103	0.231306	0.159298
100	0.00749517	0.672865	0.68036	1.3674
150	0.00341753	0.933837	0.937255	2.6433
200	0.0031289	1.01686	1.01999	3.13511
300	0.00162703	1.0292	1.03083	3.17782
400	0.0231393	1.00588	1.02901	3.0426
500	0.0782805	1.05194	1.13022	3.35635
T(A)	0.114202	5.93379	6.04799	16.8821
Sum(X^2)	0.00676172	5.58941
Sum of Means	6.04799
Total N	48
Correction Factor	6.85841
ANOVA Table
Factor	SS	Df	Ms	F(cal)		P(F<=F(cal))	F(0.05)
A (Columns)	6.35017	1	6.35017	2171.44	*** (P<=0.001)	5.5174e-31	4.1491
B (Rows)	1.8929	7	0.270414	92.4681	*** (P<=0.001)	2.09451e-19	2.31274
AxB (Interaction)	1.68703	7	0.241005	82.4115	*** (P<=0.001)	1.18982e-18	2.31274
AB	9.9301
R(AB) (Error)	0.0935809	32	0.0029244
ABR (Total)	10.0237	47
MHC a3_0nM	MHC a3_50nM	MHC a3_100nM	MHC a3_150nM	MHC a3_200nM	MHC a3_300nM	MHC a3_400nM	MHC a3_500nM	scFv_0nM	scFv_50nM	scFv_100nM	scFv_150nM	scFv_200nM	scFv_300nM	scFv_400nM	scFv_500nM
-0.0036404	0.0137016	-0.0031508	-0.0026128	-0.0120517	0.0011809	0.067648	0.0940057	-0.010887	0.236828	0.630179	0.814711	0.871276	1.02486	0.969229	1.1587
-0.0056853	-0.008744	0.0049032	-0.0032467	-0.003026	0.0020557	0.0004219	0.0713071	-0.0029453	0.234535	0.639615	0.94056	1.10656	1.0303	1.00619	0.978925
-0.0029423	-0.0013501	0.0207331	0.0161121	0.0244644	0.0016445	0.001348	0.0695286	-0.0068375	0.218948	0.7488	1.04624	1.07274	1.03246	1.04221	1.01819
Tukey Test: Pairwise Comparisons for One-Way Layout Design
	MHC a3_0nM	MHC a3_50nM	MHC a3_100nM	MHC a3_150nM	MHC a3_200nM	MHC a3_300nM	MHC a3_400nM	MHC a3_500nM	scFv_0nM	scFv_50nM	scFv_100nM	scFv_150nM	scFv_200nM	scFv_300nM	scFv_400nM	scFv_500nM
Mean	-0.00408933	0.0012025	0.00749517	0.00341753	0.0031289	0.00162703	0.0231393	0.0782805	-0.00688993	0.230103	0.672865	0.933837	1.01686	1.0292	1.00588	1.05194
S.E.M.	0.000823037	0.00660399	0.00701543	0.00634992	0.0109813	0.000252684	0.022256	0.00787936	0.00229272	0.00561697	0.0380653	0.0669211	0.0734421	0.00226101	0.0210681	0.054571
S.D.	0.00142554	0.0114384	0.0121511	0.0109984	0.0190202	0.000437661	0.0385484	0.0136475	0.00397111	0.00972888	0.065931	0.115911	0.127206	0.00391619	0.036491	0.0945197
Variance	2.03217e-06	0.000130838	0.000147649	0.000120964	0.000361768	1.91548e-07	0.00148598	0.000186253	1.57697e-05	9.46511e-05	0.00434689	0.0134353	0.0161812	1.53365e-05	0.00133159	0.00893398
Sum	-0.012268	0.0036075	0.0224855	0.0102526	0.0093867	0.0048811	0.0694179	0.234841	-0.0206698	0.69031	2.01859	2.80151	3.05057	3.08761	3.01763	3.15582
N	3	3	3	3	3	3	3	3	3	3	3	3	3	3	3	3
Sum(x^2)	5.42323e-05	0.000266014	0.00046383	0.000276968	0.000752907	8.32481e-06	0.00457825	0.018756	0.000173953	0.159032	1.36693	2.64303	3.13435	3.17781	3.03802	3.33759
Sum^2/N	5.01679e-05	4.33802e-06	0.000168533	3.50386e-05	2.937e-05	7.94171e-06	0.00160628	0.0183835	0.000142414	0.158843	1.35824	2.61616	3.10199	3.17778	3.03536	3.31972
SS	4.06434e-06	0.000261676	0.000295298	0.000241929	0.000723537	3.83095e-07	0.00297197	0.000372506	3.15394e-05	0.000189302	0.00869378	0.0268706	0.0323625	3.06731e-05	0.00266319	0.017868
Total Sum	18.144
Total N	48
Errors Estimates
SS(E)	0.0935809
Df(E)	32
Var(E)	0.0029244
SE(E)	0.0540778
t-Table	Upper Right: tij; Lower Left: Upper Probability (Studentized Range Distribution)
	MHC a3_0nM		MHC a3_50nM		MHC a3_100nM		MHC a3_150nM		MHC a3_200nM		MHC a3_300nM		MHC a3_400nM		MHC a3_500nM		scFv_0nM		scFv_50nM		scFv_100nM		scFv_150nM		scFv_200nM		scFv_300nM		scFv_400nM		scFv_500nM
MHC a3_0nM			0.119849	N.S. (P>0.05)	0.262364	N.S. (P>0.05)	0.170014	N.S. (P>0.05)	0.163477	N.S. (P>0.05)	0.129463	N.S. (P>0.05)	0.61667	N.S. (P>0.05)	1.8655	N.S. (P>0.05)	-0.0634276	N.S. (P>0.05)	5.30396	*** (P<=0.001)	15.3316	*** (P<=0.001)	21.242	*** (P<=0.001)	23.1222	*** (P<=0.001)	23.4019	*** (P<=0.001)	22.8735	*** (P<=0.001)	23.9168	*** (P<=0.001)
MHC a3_50nM	1				0.142515	N.S. (P>0.05)	0.0501657	N.S. (P>0.05)	0.0436288	N.S. (P>0.05)	0.00961477	N.S. (P>0.05)	0.496821	N.S. (P>0.05)	1.74565	N.S. (P>0.05)	-0.183276	N.S. (P>0.05)	5.18411	** (P<=0.01)	15.2117	*** (P<=0.001)	21.1222	*** (P<=0.001)	23.0024	*** (P<=0.001)	23.282	*** (P<=0.001)	22.7537	*** (P<=0.001)	23.7969	*** (P<=0.001)
MHC a3_100nM	1		1				-0.0923496	N.S. (P>0.05)	-0.0988865	N.S. (P>0.05)	-0.132901	N.S. (P>0.05)	0.354306	N.S. (P>0.05)	1.60313	N.S. (P>0.05)	-0.325792	N.S. (P>0.05)	5.0416	** (P<=0.01)	15.0692	*** (P<=0.001)	20.9797	*** (P<=0.001)	22.8599	*** (P<=0.001)	23.1395	*** (P<=0.001)	22.6112	*** (P<=0.001)	23.6544	*** (P<=0.001)
MHC a3_150nM	1		1		1				-0.00653692	N.S. (P>0.05)	-0.040551	N.S. (P>0.05)	0.446656	N.S. (P>0.05)	1.69548	N.S. (P>0.05)	-0.233442	N.S. (P>0.05)	5.13395	** (P<=0.01)	15.1615	*** (P<=0.001)	21.072	*** (P<=0.001)	22.9522	*** (P<=0.001)	23.2318	*** (P<=0.001)	22.7035	*** (P<=0.001)	23.7467	*** (P<=0.001)
MHC a3_200nM	1		1		1		1				-0.034014	N.S. (P>0.05)	0.453193	N.S. (P>0.05)	1.70202	N.S. (P>0.05)	-0.226905	N.S. (P>0.05)	5.14048	** (P<=0.01)	15.1681	*** (P<=0.001)	21.0785	*** (P<=0.001)	22.9587	*** (P<=0.001)	23.2384	*** (P<=0.001)	22.71	*** (P<=0.001)	23.7533	*** (P<=0.001)
MHC a3_300nM	1		1		1		1		1				0.487207	N.S. (P>0.05)	1.73604	N.S. (P>0.05)	-0.192891	N.S. (P>0.05)	5.1745	** (P<=0.01)	15.2021	*** (P<=0.001)	21.1126	*** (P<=0.001)	22.9928	*** (P<=0.001)	23.2724	*** (P<=0.001)	22.7441	*** (P<=0.001)	23.7873	*** (P<=0.001)
MHC a3_400nM	0.999999		1		1		1		1		1				1.24883	N.S. (P>0.05)	-0.680098	N.S. (P>0.05)	4.68729	** (P<=0.01)	14.7149	*** (P<=0.001)	20.6253	*** (P<=0.001)	22.5056	*** (P<=0.001)	22.7852	*** (P<=0.001)	22.2569	*** (P<=0.001)	23.3001	*** (P<=0.001)
MHC a3_500nM	0.872647		0.917822		0.956131		0.933168		0.931286		0.920925		0.995289				-1.92893	N.S. (P>0.05)	3.43846	N.S. (P>0.05)	13.4661	*** (P<=0.001)	19.3765	*** (P<=0.001)	21.2567	*** (P<=0.001)	21.5364	*** (P<=0.001)	21.008	*** (P<=0.001)	22.0513	*** (P<=0.001)
scFv_0nM	1		1		1		1		1		1		0.999996		0.843964				5.36739	*** (P<=0.001)	15.395	*** (P<=0.001)	21.3054	*** (P<=0.001)	23.1857	*** (P<=0.001)	23.4653	*** (P<=0.001)	22.937	*** (P<=0.001)	23.9802	*** (P<=0.001)
scFv_50nM	0.000754433		0.00105225		0.00156033		0.00120907		0.00118739		0.00108067		0.00410528		0.0923156		0.000632386				10.0276	*** (P<=0.001)	15.9381	*** (P<=0.001)	17.8183	*** (P<=0.001)	18.0979	*** (P<=0.001)	17.5696	*** (P<=0.001)	18.6128	*** (P<=0.001)
scFv_100nM	2.38683e-06		2.38683e-06		2.38683e-06		2.38683e-06		2.38683e-06		2.38683e-06		2.38683e-06		2.38683e-06		2.38683e-06		2.38906e-06				5.91046	*** (P<=0.001)	7.79067	*** (P<=0.001)	8.07031	*** (P<=0.001)	7.54197	*** (P<=0.001)	8.5852	*** (P<=0.001)
scFv_150nM	2.38683e-06		2.38683e-06		2.38683e-06		2.38683e-06		2.38683e-06		2.38683e-06		2.38683e-06		2.38683e-06		2.38683e-06		2.38683e-06		0.000139465				1.88021	N.S. (P>0.05)	2.15985	N.S. (P>0.05)	1.63151	N.S. (P>0.05)	2.67474	N.S. (P>0.05)
scFv_200nM	2.38683e-06		2.38683e-06		2.38683e-06		2.38683e-06		2.38683e-06		2.38683e-06		2.38683e-06		2.38683e-06		2.38683e-06		2.38683e-06		3.12723e-06		0.866282				0.279638	N.S. (P>0.05)	-0.248698	N.S. (P>0.05)	0.794531	N.S. (P>0.05)
scFv_300nM	2.38683e-06		2.38683e-06		2.38683e-06		2.38683e-06		2.38683e-06		2.38683e-06		2.38683e-06		2.38683e-06		2.38683e-06		2.38683e-06		2.73566e-06		0.715982		1				-0.528336	N.S. (P>0.05)	0.514894	N.S. (P>0.05)
scFv_400nM	2.38683e-06		2.38683e-06		2.38683e-06		2.38683e-06		2.38683e-06		2.38683e-06		2.38683e-06		2.38683e-06		2.38683e-06		2.38683e-06		3.84225e-06		0.949779		1		1				1.04323	N.S. (P>0.05)
scFv_500nM	2.38683e-06		2.38683e-06		2.38683e-06		2.38683e-06		2.38683e-06		2.38683e-06		2.38683e-06		2.38683e-06		2.38683e-06		2.38683e-06		2.47591e-06		0.387389		0.999974		1		0.999306

## Sheet: Fig2B
Absorbance at 450 nm [-]
Navigator concentration [nM]	ApoE NTD-MHC a3	ApoE NTD-scFv
0	0.0016343	-0.0144505
	0.0093558	-0.0103213
	0.0013261	-0.0116217
50	-0.0031875	0.27111
	-0.0027358	0.246977
	-0.0008673	0.249429
100	-0.0023985	0.675229
	-0.0006078	0.698266
	-0.0018689	0.754312
150	0.001769	0.968277
	-0.0019686	1.09552
	-0.0043346	1.12549
200	-0.0006422	1.09481
	-0.0041483	1.22812
	-0.0007767	1.22132
300	0.0011069	1.04149
	-0.0005857	1.10703
	0.0060879	1.19299
400	-0.0064594	1.04361
	-0.0090857	1.01204
	0.0039459	1.07981
500	0.0655728	1.08095
	0.0650513	0.970524
	0.0665161	1.10059
Two-Way ANOVA With Replication
0	ApoE NTD-MHC a3	ApoE NTD-scFv	Total
Mean	0.0041054	-0.0121312
S.E.M.	0.00262671	0.00121891
S.D.	0.00454959	0.00211122
Variance	2.06988e-05	4.45724e-06
Sum	0.0123162	-0.0363935	-0.0240773
N	3	3	6
Sum(x^2)	9.19605e-05	0.00045041	0.000542371
Sum^2/N	5.05629e-05	0.000441496
50	ApoE NTD-MHC a3	ApoE NTD-scFv	Total
Mean	-0.00226353	0.255839
S.E.M.	0.00071019	0.00766807
S.D.	0.00123008	0.0132815
Variance	1.51311e-06	0.000176398
Sum	-0.0067906	0.767517	0.760726
N	3	3	6
Sum(x^2)	1.8397e-05	0.196713	0.196732
Sum^2/N	1.53707e-05	0.196361
100	ApoE NTD-MHC a3	ApoE NTD-scFv	Total
Mean	-0.00162507	0.709269
S.E.M.	0.000531113	0.0234828
S.D.	0.000919914	0.0406735
Variance	8.46243e-07	0.00165433
Sum	-0.0048752	2.12781	2.12293
N	3	3	6
Sum(x^2)	9.61501e-06	1.5125	1.51251
Sum^2/N	7.92253e-06	1.50919
150	ApoE NTD-MHC a3	ApoE NTD-scFv	Total
Mean	-0.0015114	1.06309
S.E.M.	0.00177673	0.0481913
S.D.	0.00307738	0.0834698
Variance	9.47026e-06	0.0069672
Sum	-0.0045342	3.18928	3.18475
N	3	3	6
Sum(x^2)	2.57935e-05	3.40444	3.40447
Sum^2/N	6.85299e-06	3.39051
200	ApoE NTD-MHC a3	ApoE NTD-scFv	Total
Mean	-0.00185573	1.18142
S.E.M.	0.00114694	0.0433478
S.D.	0.00198656	0.0750806
Variance	3.94642e-06	0.0056371
Sum	-0.0055672	3.54426	3.53869
N	3	3	6
Sum(x^2)	1.82241e-05	4.19853	4.19855
Sum^2/N	1.03312e-05	4.18726
300	ApoE NTD-MHC a3	ApoE NTD-scFv	Total
Mean	0.00220303	1.11383
S.E.M.	0.00200294	0.0438665
S.D.	0.0034692	0.075979
Variance	1.20354e-05	0.00577281
Sum	0.0066091	3.3415	3.3481
N	3	3	6
Sum(x^2)	3.86308e-05	3.73341	3.73345
Sum^2/N	1.45601e-05	3.72186
400	ApoE NTD-MHC a3	ApoE NTD-scFv	Total
Mean	-0.0038664	1.04515
S.E.M.	0.00397904	0.0195787
S.D.	0.00689191	0.0339113
Variance	4.74984e-05	0.00114998
Sum	-0.0115992	3.13546	3.12386
N	3	3	6
Sum(x^2)	0.000139844	3.27933	3.27947
Sum^2/N	4.48471e-05	3.27703
500	ApoE NTD-MHC a3	ApoE NTD-scFv	Total
Mean	0.0657134	1.05069
S.E.M.	0.000428655	0.040481
S.D.	0.000742453	0.0701151
Variance	5.51236e-07	0.00491613
Sum	0.19714	3.15206	3.3492
N	3	3	6
Sum(x^2)	0.0129559	3.32167	3.33462
Sum^2/N	0.0129548	3.31184
Sum Table
	ApoE NTD-MHC a3	ApoE NTD-scFv	T(B)	Sum(x^2)
0	0.0041054	-0.0121312	-0.00802577	0.000542371
50	-0.00226353	0.255839	0.253575	0.196732
100	-0.00162507	0.709269	0.707644	1.51251
150	-0.0015114	1.06309	1.06158	3.40447
200	-0.00185573	1.18142	1.17956	4.19855
300	0.00220303	1.11383	1.11603	3.73345
400	-0.0038664	1.04515	1.04129	3.27947
500	0.0657134	1.05069	1.1164	3.33462
T(A)	0.0608997	6.40716	6.46806	19.6603
Sum(X^2)	0.0043684	6.53149
Sum of Means	6.46806
Total N	48
Correction Factor	7.84422
ANOVA Table
Factor	SS	Df	Ms	F(cal)		P(F<=F(cal))	F(0.05)
A (Columns)	7.55157	1	7.55157	4581.05	*** (P<=0.001)	4.03624e-36	4.1491
B (Rows)	2.14521	7	0.306458	185.908	*** (P<=0.001)	4.5615e-24	2.31274
AxB (Interaction)	2.06659	7	0.295228	179.096	*** (P<=0.001)	8.15192e-24	2.31274
AB	11.7634
R(AB) (Error)	0.0527499	32	0.00164844
ABR (Total)	11.8161	47
MHC a3_0nM	MHC a3_50nM	MHC a3_100nM	MHC a3_150nM	MHC a3_200nM	MHC a3_300nM	MHC a3_400nM	MHC a3_500nM	scFv_0nM	scFv_50nM	scFv_100nM	scFv_150nM	scFv_200nM	scFv_300nM	scFv_400nM	scFv_500nM
0.0016343	-0.0031875	-0.0023985	0.001769	-0.0006422	0.0011069	-0.0064594	0.0655728	-0.0144505	0.27111	0.675229	0.968277	1.09481	1.04149	1.04361	1.08095
0.0093558	-0.0027358	-0.0006078	-0.0019686	-0.0041483	-0.0005857	-0.0090857	0.0650513	-0.0103213	0.246977	0.698266	1.09552	1.22812	1.10703	1.01204	0.970524
0.0013261	-0.0008673	-0.0018689	-0.0043346	-0.0007767	0.0060879	0.0039459	0.0665161	-0.0116217	0.249429	0.754312	1.12549	1.22132	1.19299	1.07981	1.10059
Tukey Test: Pairwise Comparisons for One-Way Layout Design
	MHC a3_0nM	MHC a3_50nM	MHC a3_100nM	MHC a3_150nM	MHC a3_200nM	MHC a3_300nM	MHC a3_400nM	MHC a3_500nM	scFv_0nM	scFv_50nM	scFv_100nM	scFv_150nM	scFv_200nM	scFv_300nM	scFv_400nM	scFv_500nM
Mean	0.0041054	-0.00226353	-0.00162507	-0.0015114	-0.00185573	0.00220303	-0.0038664	0.0657134	-0.0121312	0.255839	0.709269	1.06309	1.18142	1.11383	1.04515	1.05069
S.E.M.	0.00262671	0.00071019	0.000531113	0.00177673	0.00114694	0.00200294	0.00397904	0.000428655	0.00121891	0.00766807	0.0234828	0.0481913	0.0433478	0.0438665	0.0195787	0.040481
S.D.	0.00454959	0.00123008	0.000919914	0.00307738	0.00198656	0.0034692	0.00689191	0.000742453	0.00211122	0.0132815	0.0406735	0.0834698	0.0750806	0.075979	0.0339113	0.0701151
Variance	2.06988e-05	1.51311e-06	8.46243e-07	9.47026e-06	3.94642e-06	1.20354e-05	4.74984e-05	5.51236e-07	4.45724e-06	0.000176398	0.00165433	0.0069672	0.0056371	0.00577281	0.00114998	0.00491613
Sum	0.0123162	-0.0067906	-0.0048752	-0.0045342	-0.0055672	0.0066091	-0.0115992	0.19714	-0.0363935	0.767517	2.12781	3.18928	3.54426	3.3415	3.13546	3.15206
N	3	3	3	3	3	3	3	3	3	3	3	3	3	3	3	3
Sum(x^2)	9.19605e-05	1.8397e-05	9.61501e-06	2.57935e-05	1.82241e-05	3.86308e-05	0.000139844	0.0129559	0.00045041	0.196713	1.5125	3.40444	4.19853	3.73341	3.27933	3.32167
Sum^2/N	5.05629e-05	1.53707e-05	7.92253e-06	6.85299e-06	1.03312e-05	1.45601e-05	4.48471e-05	0.0129548	0.000441496	0.196361	1.50919	3.39051	4.18726	3.72186	3.27703	3.31184
SS	4.13975e-05	3.02622e-06	1.69249e-06	1.89405e-05	7.89284e-06	2.40707e-05	9.49968e-05	1.10247e-06	8.91448e-06	0.000352796	0.00330866	0.0139344	0.0112742	0.0115456	0.00229996	0.00983227
Total Sum	19.4042
Total N	48
Errors Estimates
SS(E)	0.0527499
Df(E)	32
Var(E)	0.00164844
SE(E)	0.0406009
t-Table	Upper Right: tij; Lower Left: Upper Probability (Studentized Range Distribution)
	MHC a3_0nM		MHC a3_50nM		MHC a3_100nM		MHC a3_150nM		MHC a3_200nM		MHC a3_300nM		MHC a3_400nM		MHC a3_500nM		scFv_0nM		scFv_50nM		scFv_100nM		scFv_150nM		scFv_200nM		scFv_300nM		scFv_400nM		scFv_500nM
MHC a3_0nM			-0.192122	N.S. (P>0.05)	-0.172862	N.S. (P>0.05)	-0.169433	N.S. (P>0.05)	-0.17982	N.S. (P>0.05)	-0.0573857	N.S. (P>0.05)	-0.240473	N.S. (P>0.05)	1.85843	N.S. (P>0.05)	-0.489783	N.S. (P>0.05)	7.59365	*** (P<=0.001)	21.2716	*** (P<=0.001)	31.9449	*** (P<=0.001)	35.5142	*** (P<=0.001)	33.4754	*** (P<=0.001)	31.4036	*** (P<=0.001)	31.5706	*** (P<=0.001)
MHC a3_50nM	1				0.0192596	N.S. (P>0.05)	0.0226884	N.S. (P>0.05)	0.0123015	N.S. (P>0.05)	0.134736	N.S. (P>0.05)	-0.0483512	N.S. (P>0.05)	2.05055	N.S. (P>0.05)	-0.297662	N.S. (P>0.05)	7.78577	*** (P<=0.001)	21.4637	*** (P<=0.001)	32.137	*** (P<=0.001)	35.7063	*** (P<=0.001)	33.6675	*** (P<=0.001)	31.5958	*** (P<=0.001)	31.7627	*** (P<=0.001)
MHC a3_100nM	1		1				0.00342881	N.S. (P>0.05)	-0.00695816	N.S. (P>0.05)	0.115476	N.S. (P>0.05)	-0.0676108	N.S. (P>0.05)	2.03129	N.S. (P>0.05)	-0.316921	N.S. (P>0.05)	7.76651	*** (P<=0.001)	21.4444	*** (P<=0.001)	32.1177	*** (P<=0.001)	35.6871	*** (P<=0.001)	33.6482	*** (P<=0.001)	31.5765	*** (P<=0.001)	31.7435	*** (P<=0.001)
MHC a3_150nM	1		1		1				-0.010387	N.S. (P>0.05)	0.112048	N.S. (P>0.05)	-0.0710396	N.S. (P>0.05)	2.02787	N.S. (P>0.05)	-0.32035	N.S. (P>0.05)	7.76308	*** (P<=0.001)	21.441	*** (P<=0.001)	32.1143	*** (P<=0.001)	35.6836	*** (P<=0.001)	33.6448	*** (P<=0.001)	31.5731	*** (P<=0.001)	31.7401	*** (P<=0.001)
MHC a3_200nM	1		1		1		1				0.122434	N.S. (P>0.05)	-0.0606526	N.S. (P>0.05)	2.03825	N.S. (P>0.05)	-0.309963	N.S. (P>0.05)	7.77347	*** (P<=0.001)	21.4514	*** (P<=0.001)	32.1247	*** (P<=0.001)	35.694	*** (P<=0.001)	33.6552	*** (P<=0.001)	31.5835	*** (P<=0.001)	31.7504	*** (P<=0.001)
MHC a3_300nM	1		1		1		1		1				-0.183087	N.S. (P>0.05)	1.91582	N.S. (P>0.05)	-0.432397	N.S. (P>0.05)	7.65104	*** (P<=0.001)	21.329	*** (P<=0.001)	32.0022	*** (P<=0.001)	35.5716	*** (P<=0.001)	33.5328	*** (P<=0.001)	31.461	*** (P<=0.001)	31.628	*** (P<=0.001)
MHC a3_400nM	1		1		1		1		1		1				2.09891	N.S. (P>0.05)	-0.24931	N.S. (P>0.05)	7.83412	*** (P<=0.001)	21.512	*** (P<=0.001)	32.1853	*** (P<=0.001)	35.7547	*** (P<=0.001)	33.7159	*** (P<=0.001)	31.6441	*** (P<=0.001)	31.8111	*** (P<=0.001)
MHC a3_500nM	0.875642		0.780602		0.791302		0.793182		0.787463		0.850152		0.752774				-2.34822	N.S. (P>0.05)	5.73522	*** (P<=0.001)	19.4131	*** (P<=0.001)	30.0864	*** (P<=0.001)	33.6558	*** (P<=0.001)	31.617	*** (P<=0.001)	29.5452	*** (P<=0.001)	29.7122	*** (P<=0.001)
scFv_0nM	1		1		1		1		1		1		1		0.594607				8.08343	*** (P<=0.001)	21.7614	*** (P<=0.001)	32.4346	*** (P<=0.001)	36.004	*** (P<=0.001)	33.9652	*** (P<=0.001)	31.8934	*** (P<=0.001)	32.0604	*** (P<=0.001)
scFv_50nM	3.65092e-06		3.13711e-06		3.17726e-06		3.18463e-06		3.16252e-06		3.4681e-06		3.04519e-06		0.000226883		2.72362e-06				13.6779	*** (P<=0.001)	24.3512	*** (P<=0.001)	27.9206	*** (P<=0.001)	25.8817	*** (P<=0.001)	23.81	*** (P<=0.001)	23.977	*** (P<=0.001)
scFv_100nM	2.38683e-06		2.38683e-06		2.38683e-06		2.38683e-06		2.38683e-06		2.38683e-06		2.38683e-06		2.38683e-06		2.38683e-06		2.38683e-06				10.6733	*** (P<=0.001)	14.2426	*** (P<=0.001)	12.2038	*** (P<=0.001)	10.1321	*** (P<=0.001)	10.2991	*** (P<=0.001)
scFv_150nM	2.38683e-06		2.38683e-06		2.38683e-06		2.38683e-06		2.38683e-06		2.38683e-06		2.38683e-06		2.38683e-06		2.38683e-06		2.38683e-06		2.38728e-06				3.56935	N.S. (P>0.05)	1.53053	N.S. (P>0.05)	-0.541226	N.S. (P>0.05)	-0.374234	N.S. (P>0.05)
scFv_200nM	2.38683e-06		2.38683e-06		2.38683e-06		2.38683e-06		2.38683e-06		2.38683e-06		2.38683e-06		2.38683e-06		2.38683e-06		2.38683e-06		2.38683e-06		0.0689257				-2.03883	N.S. (P>0.05)	-4.11058	* (P<=0.05)	-3.94359	* (P<=0.05)
scFv_300nM	2.38683e-06		2.38683e-06		2.38683e-06		2.38683e-06		2.38683e-06		2.38683e-06		2.38683e-06		2.38683e-06		2.38683e-06		2.38683e-06		2.38684e-06		0.969745		0.787144				-2.07175	N.S. (P>0.05)	-1.90476	N.S. (P>0.05)
scFv_400nM	2.38683e-06		2.38683e-06		2.38683e-06		2.38683e-06		2.38683e-06		2.38683e-06		2.38683e-06		2.38683e-06		2.38683e-06		2.38683e-06		2.38855e-06		1		0.0186594		0.768566				0.166992	N.S. (P>0.05)
scFv_500nM	2.38683e-06		2.38683e-06		2.38683e-06		2.38683e-06		2.38683e-06		2.38683e-06		2.38683e-06		2.38683e-06		2.38683e-06		2.38683e-06		2.38796e-06		1		0.028336		0.855269		1

## Sheet: Fig2C
Ratio (absorbance at 450 nm in FBS / absorbance at 450 nm in blocking buffer) [%]
Navigator conc. [nM]	0	50	100	150	200	300	400	500
Mean absorbance at 450 in blocking buffer [-]	-0.00688993	0.230103	0.672865	0.933837	1.01686	1.0292	1.00588	1.05194
Absorbance at 450 in FBS in ApoE NTD-scFv group [-]
Sample 1	-0.0144505	0.27111	0.675229	0.968277	1.09481	1.04149	1.04361	1.08095
Sample 2	-0.0103213	0.246977	0.698266	1.09552	1.22812	1.10703	1.01204	0.970524
Sample 3	-0.0116217	0.249429	0.754312	1.12549	1.22132	1.19299	1.07981	1.10059
Ratio [%]
Sample 1	209.734	117.821	100.351	103.688	107.666	101.193	103.751	102.758
Sample 2	149.803	107.333	103.775	117.314	120.776	107.561	100.613	92.2605
Sample 3	168.677	108.399	112.105	120.523	120.108	115.913	107.35	104.625
mean	176.071	111.184	105.41	113.841	116.184	108.223	103.905	99.8811
sd	30.6421	5.77197	6.04482	8.93836	7.3836	7.38231	3.37133	6.66533

## Sheet: Fig3
Ratio (/ fluorescence of the Blank group) [%]
Alexa488 fluorescence [-]	Blank	ApoE NTD-scFv(100nM)	Blocking buffer			Blank	ApoE NTD-scFv(100nM)	Blocking buffer
Albumin	14.2807	20.3678	5.63139		Fibrinogen	27.8525	8.54678	2.76128
	17.8089	19.3142	3.22904			24.4244	9.27751	2.07474
	17.3401	16.0271	7.94934			26.8823	21.3908	2.75615
	14.8051	14.059	4.48532			26.129	8.89821	2.68747
	23.9778	5.79918	9.84956			16.5188	3.75585	1.5209
	58.7456	56.9814	5.6512			16.009	3.86327	1.83809
	14.4221	5.4935	4.71924			15.8395	4.53197	1.46148
	31.3001	6.16205	13.6871			14.3111	4.08824	5.8
mean	24.085	18.0255	6.90027		mean	20.9958	8.04408	2.61251
sd	15.1842	16.868	3.44543		sd	5.80584	5.90992	1.39458
Ratio to Blank [%]	Blank	ApoE NTD-scFv(100nM)	Blocking buffer		Ratio to Blank [%]	Blank	ApoE NTD-scFv(100nM)	Blocking buffer
	59.2928	84.5662	23.3813			132.657	40.707	13.1516
	73.9417	80.1917	13.4068			116.33	44.1874	9.88168
	71.9953	66.5438	33.0053			128.036	101.881	13.1271
	61.4701	58.3723	18.6228			124.449	42.3809	12.8
	99.5547	24.0779	40.8949			78.6766	17.8886	7.24382
	243.909	236.584	23.4635			76.2485	18.4002	8.75455
	59.8799	22.8088	19.5941			75.4412	21.5851	6.96081
	129.957	25.5845	56.8282			68.1616	19.4717	27.6245
Ratio to Blank [%]	Blank	ApoE NTD-scFv(100nM)	Blocking buffer
Albumin	59.2928	84.5662	23.3813
	73.9417	80.1917	13.4068
	71.9953	66.5438	33.0053
	61.4701	58.3723	18.6228
	99.5547	24.0779	40.8949
	243.909	236.584	23.4635
	59.8799	22.8088	19.5941
	129.957	25.5845	56.8282
Fibrinogen	132.657	40.707	13.1516
	116.33	44.1874	9.88168
	128.036	101.881	13.1271
	124.449	42.3809	12.8
	78.6766	17.8886	7.24382
	76.2485	18.4002	8.75455
	75.4412	21.5851	6.96081
	68.1616	19.4717	27.6245
Two-Way ANOVA With Replication
Albumin	Blank	ApoE NTD-scFv(100nM)	Blocking buffer	Total
Mean	100	74.8412	28.6496
S.E.M.	22.2895	24.7612	5.05768
S.D.	63.0441	70.0352	14.3053
Variance	3974.56	4904.93	204.641
Sum	800	598.729	229.197	1627.93
N	8	8	8	24
Sum(x^2)	107822	79144.1	7998.89	194965
Sum^2/N	80000	44809.6	6566.4
Fibrinogen	Blank	ApoE NTD-scFv(100nM)	Blocking buffer	Total
Mean	100	38.3128	12.443
S.E.M.	9.77659	9.95185	2.34836
S.D.	27.6524	28.1481	6.64216
Variance	764.653	792.314	44.1182
Sum	800	306.502	99.5441	1206.05
N	8	8	8	24
Sum(x^2)	85352.6	17289.1	1547.46	104189
Sum^2/N	80000	11742.9	1238.63
Sum Table
	Blank	ApoE NTD-scFv(100nM)	Blocking buffer	T(B)	Sum(x^2)
Albumin	100	74.8412	28.6496	203.491	194965
Fibrinogen	100	38.3128	12.443	150.756	104189
T(A)	200	113.154	41.0926	354.247	299154
Sum(X^2)	20000	7069.07	975.629
Sum of Means	354.247
Total N	48
Correction Factor	167321
ANOVA Table
Factor	SS	Df	Ms	F(cal)		P(F<=F(cal))	F(0.05)
A (Columns)	50648.8	2	25324.4	14.2202	*** (P<=0.001)	1.92294e-05	3.21994
B (Rows)	3707.97	1	3707.97	2.08211	N.S. (P>0.05)	0.156451	4.07265
AxB (Interaction)	2679.94	2	1339.97	0.752423	N.S. (P>0.05)	0.477468	3.21994
AB	57036.7
R(AB) (Error)	74796.6	42	1780.87
ABR (Total)	131833	47
Blank	ApoE NTD-scFv(100nM)	Blocking buffer
59.2928	84.5662	23.3813
73.9417	80.1917	13.4068
71.9953	66.5438	33.0053
61.4701	58.3723	18.6228
99.5547	24.0779	40.8949
243.909	236.584	23.4635
59.8799	22.8088	19.5941
129.957	25.5845	56.8282
132.657	40.707	13.1516
116.33	44.1874	9.88168
128.036	101.881	13.1271
124.449	42.3809	12.8
78.6766	17.8886	7.24382
76.2485	18.4002	8.75455
75.4412	21.5851	6.96081
68.1616	19.4717	27.6245
Tukey Test: Pairwise Comparisons for One-Way Layout Design
	Blank	ApoE NTD-scFv(100nM)	Blocking buffer
Mean	100	56.577	20.5463
S.E.M.	11.757	13.7262	3.41072
S.D.	47.028	54.9048	13.6429
Variance	2211.63	3014.54	186.129
Sum	1600	905.231	328.741
N	16	16	16
Sum(x^2)	193175	96433.3	9546.34
Sum^2/N	160000	51215.2	6754.42
SS	33174.5	45218	2791.93
Total Sum	2833.97
Total N	48
Errors Estimates
SS(E)	81184.5
Df(E)	45
Var(E)	1804.1
SE(E)	42.4747
t-Table	Upper Right: tij; Lower Left: Upper Probability (Studentized Range Distribution)
	Blank		ApoE NTD-scFv(100nM)		Blocking buffer
Blank			-2.89158	* (P<=0.05)	-5.29089	*** (P<=0.001)
ApoE NTD-scFv(100nM)	0.0159178				-2.39931	N.S. (P>0.05)
Blocking buffer	1.17968e-05		0.0528582

## Sheet: Fig4
DMPC_Brifhtfield
DMPC_Alexa555
Alexa555-ApoE NTD-scFv_Brifhtfield
Alexa555-ApoE NTD-scFv_Alexa555
Alexa555-ApoE NTD-scFv+DMPC_Brifhtfield
Alexa555-ApoE NTD-scFv+DMPC_Alexa555

## Sheet: Fig5
Accumulation of Alexa750-ApoE NTD-scFv+DMPC [% to detected amount]
	Heart	Lung	Liver	Kidney	Spleen	Intestines	Urine	Plasma
Mouse 1	ND (0)	ND (0)	71.9626	17.6282	2.84373	0.392614	6.64079	0.532068
Mouse 2	0.00196949	0.0443603	71.5959	16.8519	2.55773	0.279821	5.76967	2.89866
Mouse 3	0.00962672	ND (0)	82.5186	10.6037	2.09059	0.123308	4.55843	0.095827
Mean	0.00386541	0.0147868	75.359	15.0279	2.49735	0.265248	5.6563	1.17552
sd	0.0050857	0.0256114	6.20305	3.85112	0.380181	0.135243	1.0458	1.50814

## Sheet: Fig6A
Accumulation of Alexa750-b2-m [% to detected amount]
	Heart	Lung	Spleen	Liver	Kidney	Intestines	Urine	Plasma
Control	0.157188	0.086265	0.801605	27.1071	56.7574	1.44881	8.65084	4.99078
	0	0.314539	0.897785	21.0319	43.4767	3.19438	24.2646	6.82003
	0	0.300274	0.657659	29.9817	43.7192	1.81011	18.1051	5.42602
	0	0	0.0402972	21.1422	49.6155	0.300417	27.1528	1.74876
	0	0.388345	1.0127	34.5226	44.6049	2.9129	15.2944	1.26416
	0	0.460913	0.88518	21.8807	53.6625	0.5003	20.8405	1.7698
	0	0.141629	0.348734	19.0283	47.5158	1.21203	28.9448	2.80873
	0	0.112833	0	23.4857	38.0828	1.33514	31.3003	5.88511
MHC a3	0	0.0844318	0.458534	26.3824	47.5134	1.4778	11.7106	12.3728
	0.00453459	0.664019	0.946696	37.4701	46.6164	1.91691	8.05384	4.32758
	0	0.569088	1.05245	39.1842	33.3411	1.41801	20.9145	3.52061
	0	0.129545	0.397153	25.8443	57.2285	0.541185	14.5622	1.29706
	0	0	0	31.2959	48.4028	0.140298	17.9686	2.47708
	0.0284516	0.101605	0.639691	33.4872	40.3809	1.64467	21.3094	2.40807
	0.109318	0.794755	0.941294	31.772	42.8482	1.0211	20.7933	1.72005
scFv	0.273478	0.949192	0.975122	36.5925	36.373	5.19185	13.1398	6.50499
	0	0.314539	0.897785	21.0319	43.4767	3.19438	24.2646	6.82003
	0.521551	0.701499	1.19687	40.7481	37.4821	2.0908	15.811	1.44802
	0	0	0.25492	31.9407	44.7211	0.654125	17.821	4.60823
	0.0259479	0.0771941	1.18624	35.466	40.2766	1.30017	18.5261	3.14169
	0	0.390503	1.38844	29.1764	38.8281	1.65664	24.8959	3.66398
	0	0	1.19088	32.2758	41.8914	0	20.4246	4.21734
	0	0.292026	0.868495	41.6464	33.5656	1.28499	20.4055	1.93695
Two-Way ANOVA With Replication
Control	Heart	Lung	Spleen	Liver	Kidney	Intestines	Urine	Plasma	Total
Mean	0.0196485	0.2256	0.580496	24.7725	47.1794	1.58926	21.8192	3.83917
S.E.M.	0.0196485	0.0575422	0.141273	1.87957	2.13339	0.36476	2.692	0.770671
S.D.	0.0555745	0.162754	0.399581	5.31622	6.03415	1.0317	7.61411	2.17979
Variance	0.00308852	0.0264888	0.159665	28.2622	36.4109	1.0644	57.9747	4.75147
Sum	0.157188	1.8048	4.64396	198.18	377.435	12.7141	174.553	30.7134	800.202
N	8	8	8	8	8	8	8	8	64
Sum(x^2)	0.0247082	0.592583	3.81346	5107.25	18062	27.6568	4214.43	151.174	27567
Sum^2/N	0.00308852	0.407161	2.6958	4909.42	17807.1	20.206	3808.61	117.914
MHC a3	Heart	Lung	Spleen	Liver	Kidney	Intestines	Urine	Plasma	Total
Mean	0.0203292	0.334778	0.633688	32.2052	45.1902	1.16571	16.4732	4.0176
S.E.M.	0.0153433	0.124031	0.142777	1.91142	2.81023	0.239899	1.95931	1.44582
S.D.	0.0405946	0.328156	0.377752	5.05715	7.43516	0.634714	5.18385	3.82527
Variance	0.00164792	0.107687	0.142696	25.5747	55.2816	0.402862	26.8723	14.6327
Sum	0.142304	2.34344	4.43581	225.436	316.331	8.15997	115.312	28.1232	700.285
N	7	7	7	7	7	7	7	7	56
Sum(x^2)	0.0127805	1.43065	3.6671	7413.66	14626.8	11.9293	2060.8	200.784	24319
Sum^2/N	0.00289292	0.784533	2.81092	7260.21	14295.1	9.51215	1899.57	112.988
scFv	Heart	Lung	Spleen	Liver	Kidney	Intestines	Urine	Plasma	Total
Mean	0.102622	0.340619	0.994845	33.6097	39.5768	1.92162	19.4111	4.04265
S.E.M.	0.0685603	0.120086	0.12277	2.35399	1.32872	0.574827	1.40952	0.684635
S.D.	0.193918	0.339656	0.347246	6.65808	3.75819	1.62586	3.98671	1.93644
Variance	0.0376041	0.115366	0.12058	44.33	14.124	2.64341	15.8939	3.7498
Sum	0.820977	2.72495	7.95876	268.878	316.615	15.3729	155.289	32.3412	800
N	8	8	8	8	8	8	8	8	64
Sum(x^2)	0.347479	1.73573	8.76179	9347.22	12629.5	48.0448	3125.58	156.993	25318.2
Sum^2/N	0.0842504	0.928171	7.91773	9036.91	12530.6	29.5409	3014.32	130.744
Sum Table
	Heart	Lung	Spleen	Liver	Kidney	Intestines	Urine	Plasma	T(B)	Sum(x^2)
Control	0.0196485	0.2256	0.580496	24.7725	47.1794	1.58926	21.8192	3.83917	100.025	27567
MHC a3	0.0203292	0.334778	0.633688	32.2052	45.1902	1.16571	16.4732	4.0176	100.041	24319
scFv	0.102622	0.340619	0.994845	33.6097	39.5768	1.92162	19.4111	4.04265	100	25318.2
T(A)	0.1426	0.900996	2.20903	90.5874	131.946	4.67659	57.7034	11.8994	300.066	77204.2
Sum(X^2)	0.0113306	0.278993	1.72825	2780.46	5834.37	7.57725	1124.23	47.2235
Sum of Means	300.066
Total N	184
Correction Factor	28648.9
Approximate ANOVA Table for Unbalanced Case
Factor	SS	Df	Ms	F(cal)		P(F<=F(cal))	F(0.05)
A (Columns)	45461.4	7	6494.49	433.11	*** (P<=0.001)	1.6277e-100	2.06724
B (Rows)	0.000804744	1.99588	0.000402372	2.68337e-05	N.S. (P>0.05)	0.999973	3.05472
AxB (Interaction)	694.569	13.9689	49.6121	3.30857	*** (P<=0.001)	0.00011799	1.75486
AB	46156
R(AB) (Error)	2399.2	160	14.995
ABR (Total)	48555.2	183
Dfs for A, B and AxB are those for the numerators of F values.
Ctrl_Heart	Ctrl_Lung	Ctrl_Spleen	Ctrl_Liver	Ctrl_Kidney	Ctrl_Intestines	Ctrl_Urine	Ctrl_Plasma	MHC a3_Heart	MHC a3_Lung	MHC a3_Spleen	MHC a3_Liver	MHC a3_Kidney	MHC a3_Intestines	MHC a3_Urine	MHC a3_Plasma	scFv_Heart	scFv_Lung	scFv_Spleen	scFv_Liver	scFv_Kidney	scFv_Intestines	scFv_Urine	scFv_Plasma
0.157188	0.086265	0.801605	27.1071	56.7574	1.44881	8.65084	4.99078	0	0.0844318	0.458534	26.3824	47.5134	1.4778	11.7106	12.3728	0.273478	0.949192	0.975122	36.5925	36.373	5.19185	13.1398	6.50499
0	0.314539	0.897785	21.0319	43.4767	3.19438	24.2646	6.82003	0.00453459	0.664019	0.946696	37.4701	46.6164	1.91691	8.05384	4.32758	0	0.314539	0.897785	21.0319	43.4767	3.19438	24.2646	6.82003
0	0.300274	0.657659	29.9817	43.7192	1.81011	18.1051	5.42602	0	0.569088	1.05245	39.1842	33.3411	1.41801	20.9145	3.52061	0.521551	0.701499	1.19687	40.7481	37.4821	2.0908	15.811	1.44802
0	0	0.0402972	21.1422	49.6155	0.300417	27.1528	1.74876	0	0.129545	0.397153	25.8443	57.2285	0.541185	14.5622	1.29706	0	0	0.25492	31.9407	44.7211	0.654125	17.821	4.60823
0	0.388345	1.0127	34.5226	44.6049	2.9129	15.2944	1.26416	0	0	0	31.2959	48.4028	0.140298	17.9686	2.47708	0.0259479	0.0771941	1.18624	35.466	40.2766	1.30017	18.5261	3.14169
0	0.460913	0.88518	21.8807	53.6625	0.5003	20.8405	1.7698	0.0284516	0.101605	0.639691	33.4872	40.3809	1.64467	21.3094	2.40807	0	0.390503	1.38844	29.1764	38.8281	1.65664	24.8959	3.66398
0	0.141629	0.348734	19.0283	47.5158	1.21203	28.9448	2.80873	0.109318	0.794755	0.941294	31.772	42.8482	1.0211	20.7933	1.72005	0	0	1.19088	32.2758	41.8914	0	20.4246	4.21734
0	0.112833	0	23.4857	38.0828	1.33514	31.3003	5.88511									0	0.292026	0.868495	41.6464	33.5656	1.28499	20.4055	1.93695
Tukey-Kramer Test: Pairwise Comparisons for One-Way Layout Design
	Ctrl_Heart	Ctrl_Lung	Ctrl_Spleen	Ctrl_Liver	Ctrl_Kidney	Ctrl_Intestines	Ctrl_Urine	Ctrl_Plasma	MHC a3_Heart	MHC a3_Lung	MHC a3_Spleen	MHC a3_Liver	MHC a3_Kidney	MHC a3_Intestines	MHC a3_Urine	MHC a3_Plasma	scFv_Heart	scFv_Lung	scFv_Spleen	scFv_Liver	scFv_Kidney	scFv_Intestines	scFv_Urine	scFv_Plasma
Mean	0.0196485	0.2256	0.580496	24.7725	47.1794	1.58926	21.8192	3.83917	0.0203292	0.334778	0.633688	32.2052	45.1902	1.16571	16.4732	4.0176	0.102622	0.340619	0.994845	33.6097	39.5768	1.92162	19.4111	4.04265
S.E.M.	0.0196485	0.0575422	0.141273	1.87957	2.13339	0.36476	2.692	0.770671	0.0153433	0.124031	0.142777	1.91142	2.81023	0.239899	1.95931	1.44582	0.0685603	0.120086	0.12277	2.35399	1.32872	0.574827	1.40952	0.684635
S.D.	0.0555745	0.162754	0.399581	5.31622	6.03415	1.0317	7.61411	2.17979	0.0405946	0.328156	0.377752	5.05715	7.43516	0.634714	5.18385	3.82527	0.193918	0.339656	0.347246	6.65808	3.75819	1.62586	3.98671	1.93644
Variance	0.00308852	0.0264888	0.159665	28.2622	36.4109	1.0644	57.9747	4.75147	0.00164792	0.107687	0.142696	25.5747	55.2816	0.402862	26.8723	14.6327	0.0376041	0.115366	0.12058	44.33	14.124	2.64341	15.8939	3.7498
Sum	0.157188	1.8048	4.64396	198.18	377.435	12.7141	174.553	30.7134	0.142304	2.34344	4.43581	225.436	316.331	8.15997	115.312	28.1232	0.820977	2.72495	7.95876	268.878	316.615	15.3729	155.289	32.3412
N	8	8	8	8	8	8	8	8	7	7	7	7	7	7	7	7	8	8	8	8	8	8	8	8
Sum(x^2)	0.0247082	0.592583	3.81346	5107.25	18062	27.6568	4214.43	151.174	0.0127805	1.43065	3.6671	7413.66	14626.8	11.9293	2060.8	200.784	0.347479	1.73573	8.76179	9347.22	12629.5	48.0448	3125.58	156.993
Sum^2/N	0.00308852	0.407161	2.6958	4909.42	17807.1	20.206	3808.61	117.914	0.00289292	0.784533	2.81092	7260.21	14295.1	9.51215	1899.57	112.988	0.0842504	0.928171	7.91773	9036.91	12530.6	29.5409	3014.32	130.744
SS	0.0216197	0.185422	1.11766	197.835	254.877	7.45079	405.823	33.2603	0.00988754	0.64612	0.856178	153.448	331.689	2.41717	161.234	87.796	0.263228	0.807561	0.844059	310.31	98.8679	18.5039	111.257	26.2486
Total Sum	2300.49
Total N	184
Errors Estimates
SS(E)	2205.77
Df(E)	160
Var(E)	13.7861
SE(E)	3.71296
t-Table	Upper Right: tij; Lower Left: Upper Probability (Studentized Range Distribution)
	Ctrl_Heart		Ctrl_Lung		Ctrl_Spleen		Ctrl_Liver		Ctrl_Kidney		Ctrl_Intestines		Ctrl_Urine		Ctrl_Plasma		MHC a3_Heart		MHC a3_Lung		MHC a3_Spleen		MHC a3_Liver		MHC a3_Kidney		MHC a3_Intestines		MHC a3_Urine		MHC a3_Plasma		scFv_Heart		scFv_Lung		scFv_Spleen		scFv_Liver		scFv_Kidney		scFv_Intestines		scFv_Urine		scFv_Plasma
Ctrl_Heart			0.110936	N.S. (P>0.05)	0.302102	N.S. (P>0.05)	13.3332	*** (P<=0.001)	25.4028	*** (P<=0.001)	0.845479	N.S. (P>0.05)	11.7424	*** (P<=0.001)	2.0574	N.S. (P>0.05)	0.000354183	N.S. (P>0.05)	0.16399	N.S. (P>0.05)	0.319539	N.S. (P>0.05)	16.749	*** (P<=0.001)	23.5063	*** (P<=0.001)	0.596398	N.S. (P>0.05)	8.56225	*** (P<=0.001)	2.08049	N.S. (P>0.05)	0.044694	N.S. (P>0.05)	0.172892	N.S. (P>0.05)	0.525293	N.S. (P>0.05)	18.0934	*** (P<=0.001)	21.3076	*** (P<=0.001)	1.0245	N.S. (P>0.05)	10.4453	*** (P<=0.001)	2.16701	N.S. (P>0.05)
Ctrl_Lung	1				0.191166	N.S. (P>0.05)	13.2223	*** (P<=0.001)	25.2918	*** (P<=0.001)	0.734542	N.S. (P>0.05)	11.6315	*** (P<=0.001)	1.94647	N.S. (P>0.05)	-0.106821	N.S. (P>0.05)	0.0568151	N.S. (P>0.05)	0.212365	N.S. (P>0.05)	16.6418	*** (P<=0.001)	23.3991	*** (P<=0.001)	0.489223	N.S. (P>0.05)	8.45508	*** (P<=0.001)	1.97332	N.S. (P>0.05)	-0.0662423	N.S. (P>0.05)	0.0619557	N.S. (P>0.05)	0.414357	N.S. (P>0.05)	17.9825	*** (P<=0.001)	21.1967	*** (P<=0.001)	0.913567	N.S. (P>0.05)	10.3343	*** (P<=0.001)	2.05607	N.S. (P>0.05)
Ctrl_Spleen	1		1				13.0311	*** (P<=0.001)	25.1007	*** (P<=0.001)	0.543376	N.S. (P>0.05)	11.4403	*** (P<=0.001)	1.7553	N.S. (P>0.05)	-0.291505	N.S. (P>0.05)	-0.127869	N.S. (P>0.05)	0.0276805	N.S. (P>0.05)	16.4571	*** (P<=0.001)	23.2144	*** (P<=0.001)	0.304539	N.S. (P>0.05)	8.2704	*** (P<=0.001)	1.78863	N.S. (P>0.05)	-0.257408	N.S. (P>0.05)	-0.12921	N.S. (P>0.05)	0.223191	N.S. (P>0.05)	17.7913	*** (P<=0.001)	21.0055	*** (P<=0.001)	0.722401	N.S. (P>0.05)	10.1432	*** (P<=0.001)	1.86491	N.S. (P>0.05)
Ctrl_Liver	2.26556e-06		2.26556e-06		2.26556e-06				12.0695	*** (P<=0.001)	-12.4878	*** (P<=0.001)	-1.59083	N.S. (P>0.05)	-11.2758	*** (P<=0.001)	-12.8808	*** (P<=0.001)	-12.7171	*** (P<=0.001)	-12.5616	*** (P<=0.001)	3.86787	* (P<=0.05)	10.6251	*** (P<=0.001)	-12.2847	*** (P<=0.001)	-4.31887	** (P<=0.01)	-10.8006	*** (P<=0.001)	-13.2885	*** (P<=0.001)	-13.1603	*** (P<=0.001)	-12.8079	*** (P<=0.001)	4.7602	** (P<=0.01)	7.97441	*** (P<=0.001)	-12.3087	*** (P<=0.001)	-2.88796	N.S. (P>0.05)	-11.1662	*** (P<=0.001)
Ctrl_Kidney	2.26556e-06		2.26556e-06		2.26556e-06		2.26556e-06				-24.5573	*** (P<=0.001)	-13.6604	*** (P<=0.001)	-23.3454	*** (P<=0.001)	-24.5411	*** (P<=0.001)	-24.3774	*** (P<=0.001)	-24.2219	*** (P<=0.001)	-7.79242	*** (P<=0.001)	-1.03515	N.S. (P>0.05)	-23.945	*** (P<=0.001)	-15.9792	*** (P<=0.001)	-22.4609	*** (P<=0.001)	-25.3581	*** (P<=0.001)	-25.2299	*** (P<=0.001)	-24.8775	*** (P<=0.001)	-7.30935	*** (P<=0.001)	-4.09514	* (P<=0.05)	-24.3783	*** (P<=0.001)	-14.9575	*** (P<=0.001)	-23.2358	*** (P<=0.001)
Ctrl_Intestines	1		1		1		2.26556e-06		2.26556e-06				10.8969	*** (P<=0.001)	1.21192	N.S. (P>0.05)	-0.816456	N.S. (P>0.05)	-0.65282	N.S. (P>0.05)	-0.497271	N.S. (P>0.05)	15.9322	*** (P<=0.001)	22.6894	*** (P<=0.001)	-0.220412	N.S. (P>0.05)	7.74544	*** (P<=0.001)	1.26368	N.S. (P>0.05)	-0.800785	N.S. (P>0.05)	-0.672587	N.S. (P>0.05)	-0.320185	N.S. (P>0.05)	17.2479	*** (P<=0.001)	20.4622	*** (P<=0.001)	0.179025	N.S. (P>0.05)	9.59979	*** (P<=0.001)	1.32153	N.S. (P>0.05)
Ctrl_Urine	2.26556e-06		2.26556e-06		2.26556e-06		0.995859		2.26556e-06		2.26556e-06				-9.68499	*** (P<=0.001)	-11.3439	*** (P<=0.001)	-11.1802	*** (P<=0.001)	-11.0247	*** (P<=0.001)	5.40476	*** (P<=0.001)	12.162	*** (P<=0.001)	-10.7478	*** (P<=0.001)	-2.78198	N.S. (P>0.05)	-9.26374	*** (P<=0.001)	-11.6977	*** (P<=0.001)	-11.5695	*** (P<=0.001)	-11.2171	*** (P<=0.001)	6.35103	*** (P<=0.001)	9.56524	*** (P<=0.001)	-10.7179	*** (P<=0.001)	-1.29713	N.S. (P>0.05)	-9.57539	*** (P<=0.001)
Ctrl_Plasma	0.92262		0.954751		0.985566		2.26556e-06		2.26556e-06		0.999935		2.26556e-06				-1.98729	N.S. (P>0.05)	-1.82365	N.S. (P>0.05)	-1.6681	N.S. (P>0.05)	14.7614	*** (P<=0.001)	21.5186	*** (P<=0.001)	-1.39124	N.S. (P>0.05)	6.57462	*** (P<=0.001)	0.0928533	N.S. (P>0.05)	-2.01271	N.S. (P>0.05)	-1.88451	N.S. (P>0.05)	-1.53211	N.S. (P>0.05)	16.036	*** (P<=0.001)	19.2502	*** (P<=0.001)	-1.0329	N.S. (P>0.05)	8.38787	*** (P<=0.001)	0.109606	N.S. (P>0.05)
MHC a3_Heart	1		1		1		2.26556e-06		2.26556e-06		1		2.26556e-06		0.944329				0.15844	N.S. (P>0.05)	0.30905	N.S. (P>0.05)	16.2168	*** (P<=0.001)	22.7595	*** (P<=0.001)	0.577117	N.S. (P>0.05)	8.29002	*** (P<=0.001)	2.01409	N.S. (P>0.05)	0.0428244	N.S. (P>0.05)	0.166675	N.S. (P>0.05)	0.507127	N.S. (P>0.05)	17.4796	*** (P<=0.001)	20.5848	*** (P<=0.001)	0.98941	N.S. (P>0.05)	10.0907	*** (P<=0.001)	2.09317	N.S. (P>0.05)
MHC a3_Lung	1		1		1		2.26556e-06		2.26556e-06		1		2.26556e-06		0.977517		1				0.15061	N.S. (P>0.05)	16.0584	*** (P<=0.001)	22.6011	*** (P<=0.001)	0.418677	N.S. (P>0.05)	8.13159	*** (P<=0.001)	1.85565	N.S. (P>0.05)	-0.120811	N.S. (P>0.05)	0.0030398	N.S. (P>0.05)	0.343492	N.S. (P>0.05)	17.3159	*** (P<=0.001)	20.4211	*** (P<=0.001)	0.825775	N.S. (P>0.05)	9.9271	*** (P<=0.001)	1.92954	N.S. (P>0.05)
MHC a3_Spleen	1		1		1		2.26556e-06		2.26556e-06		1		2.26556e-06		0.992297		1		1				15.9078	*** (P<=0.001)	22.4504	*** (P<=0.001)	0.268067	N.S. (P>0.05)	7.98098	*** (P<=0.001)	1.70504	N.S. (P>0.05)	-0.276361	N.S. (P>0.05)	-0.15251	N.S. (P>0.05)	0.187942	N.S. (P>0.05)	17.1604	*** (P<=0.001)	20.2656	*** (P<=0.001)	0.670225	N.S. (P>0.05)	9.77155	*** (P<=0.001)	1.77399	N.S. (P>0.05)
MHC a3_Liver	2.26556e-06		2.26556e-06		2.26556e-06		0.0292662		2.26575e-06		2.26556e-06		6.19566e-05		2.26556e-06		2.26556e-06		2.26556e-06		2.26556e-06				6.54269	*** (P<=0.001)	-15.6397	*** (P<=0.001)	-7.92678	*** (P<=0.001)	-14.2027	*** (P<=0.001)	-16.7058	*** (P<=0.001)	-16.582	*** (P<=0.001)	-16.2415	*** (P<=0.001)	0.730916	N.S. (P>0.05)	3.83614	* (P<=0.05)	-15.7592	*** (P<=0.001)	-6.65791	*** (P<=0.001)	-14.6555	*** (P<=0.001)
MHC a3_Kidney	2.26556e-06		2.26556e-06		2.26556e-06		2.26556e-06		0.999996		2.26556e-06		2.26556e-06		2.26556e-06		2.26556e-06		2.26556e-06		2.26556e-06		2.473e-06				-22.1824	*** (P<=0.001)	-14.4695	*** (P<=0.001)	-20.7454	*** (P<=0.001)	-23.4631	*** (P<=0.001)	-23.3392	*** (P<=0.001)	-22.9988	*** (P<=0.001)	-6.02635	*** (P<=0.001)	-2.92112	N.S. (P>0.05)	-22.5165	*** (P<=0.001)	-13.4152	*** (P<=0.001)	-21.4127	*** (P<=0.001)
MHC a3_Intestines	1		1		1		2.26556e-06		2.26556e-06		1		2.26556e-06		0.999399		1		1		1		2.26556e-06		2.26556e-06				7.71291	*** (P<=0.001)	1.43697	N.S. (P>0.05)	-0.553219	N.S. (P>0.05)	-0.429368	N.S. (P>0.05)	-0.088916	N.S. (P>0.05)	16.8835	*** (P<=0.001)	19.9887	*** (P<=0.001)	0.393367	N.S. (P>0.05)	9.49469	*** (P<=0.001)	1.49713	N.S. (P>0.05)
MHC a3_Urine	2.26556e-06		2.26556e-06		2.26557e-06		0.00592535		2.26556e-06		2.26581e-06		0.456524		2.44075e-06		2.26557e-06		2.26558e-06		2.26562e-06		2.26564e-06		2.26556e-06		2.26587e-06				-6.27594	*** (P<=0.001)	-8.51908	*** (P<=0.001)	-8.39523	*** (P<=0.001)	-8.05477	*** (P<=0.001)	8.91766	*** (P<=0.001)	12.0229	*** (P<=0.001)	-7.57249	*** (P<=0.001)	1.52883	N.S. (P>0.05)	-6.46873	*** (P<=0.001)
MHC a3_Plasma	0.914362		0.948072		0.981992		2.26556e-06		2.26556e-06		0.999869		2.26556e-06		1		0.936617		0.97271		0.989859		2.26556e-06		2.26556e-06		0.99902		3.09979e-06				-2.03731	N.S. (P>0.05)	-1.91346	N.S. (P>0.05)	-1.57301	N.S. (P>0.05)	15.3994	*** (P<=0.001)	18.5046	*** (P<=0.001)	-1.09073	N.S. (P>0.05)	8.0106	*** (P<=0.001)	0.0130359	N.S. (P>0.05)
scFv_Heart	1		1		1		2.26556e-06		2.26556e-06		1		2.26556e-06		0.937031		1		1		1		2.26556e-06		2.26556e-06		1		2.26556e-06		0.929351				0.128198	N.S. (P>0.05)	0.480599	N.S. (P>0.05)	18.0487	*** (P<=0.001)	21.2629	*** (P<=0.001)	0.97981	N.S. (P>0.05)	10.4006	*** (P<=0.001)	2.12231	N.S. (P>0.05)
scFv_Lung	1		1		1		2.26556e-06		2.26556e-06		1		2.26556e-06		0.967729		1		1		1		2.26556e-06		2.26556e-06		1		2.26556e-06		0.96207		1				0.352401	N.S. (P>0.05)	17.9205	*** (P<=0.001)	21.1347	*** (P<=0.001)	0.851612	N.S. (P>0.05)	10.2724	*** (P<=0.001)	1.99412	N.S. (P>0.05)
scFv_Spleen	1		1		1		2.26556e-06		2.26556e-06		1		2.26556e-06		0.997529		1		1		1		2.26556e-06		2.26556e-06		1		2.2656e-06		0.996445		1		1				17.5681	*** (P<=0.001)	20.7823	*** (P<=0.001)	0.49921	N.S. (P>0.05)	9.91998	*** (P<=0.001)	1.64171	N.S. (P>0.05)
scFv_Liver	2.26556e-06		2.26556e-06		2.26556e-06		0.00102654		2.26869e-06		2.26556e-06		2.83148e-06		2.26556e-06		2.26556e-06		2.26556e-06		2.26556e-06		1		5.2308e-06		2.26556e-06		2.26556e-06		2.26556e-06		2.26556e-06		2.26556e-06		2.26556e-06				3.21421	N.S. (P>0.05)	-17.0689	*** (P<=0.001)	-7.64816	*** (P<=0.001)	-15.9264	*** (P<=0.001)
scFv_Kidney	2.26556e-06		2.26556e-06		2.26556e-06		2.26562e-06		0.0134452		2.26556e-06		2.26556e-06		2.26556e-06		2.26556e-06		2.26556e-06		2.26556e-06		0.0324709		0.357138		2.26556e-06		2.26556e-06		2.26556e-06		2.26556e-06		2.26556e-06		2.26556e-06		0.190424				-20.2831	*** (P<=0.001)	-10.8624	*** (P<=0.001)	-19.1406	*** (P<=0.001)
scFv_Intestines	0.999997		1		1		2.26556e-06		2.26556e-06		1		2.26556e-06		0.999996		0.999998		1		1		2.26556e-06		2.26556e-06		1		2.26626e-06		0.99999		0.999999		1		1		2.26556e-06		2.26556e-06				9.42077	*** (P<=0.001)	1.1425	N.S. (P>0.05)
scFv_Urine	2.26556e-06		2.26556e-06		2.26556e-06		0.379879		2.26556e-06		2.26556e-06		0.9998		2.26556e-06		2.26556e-06		2.26556e-06		2.26556e-06		2.37802e-06		2.26556e-06		2.26556e-06		0.997601		2.26561e-06		2.26556e-06		2.26556e-06		2.26556e-06		2.26601e-06		2.26556e-06		2.26556e-06				-8.27826	*** (P<=0.001)
scFv_Plasma	0.878344		0.923079		0.971181		2.26556e-06		2.26556e-06		0.99973		2.26556e-06		1		0.909586		0.958624		0.98364		2.26556e-06		2.26556e-06		0.998218		2.5718e-06		1		0.897958		0.942431		0.993724		2.26556e-06		2.26556e-06		0.999976		2.26557e-06

## Sheet: Fig6B
Ratio (b2-m accumulation in the liver / b2-m accumulation in the kidney) [%]
Control	MHC a3	scFv
47.7595	55.5263	100.603
48.375	80.3796	48.375
68.5779	117.525	108.713
42.612	45.1598	71.4219
77.3963	64.6572	88.0562
40.7747	82.9284	75.1424
40.0462	74.1502	77.0462
61.6702		124.075
One-Way ANOVA
	Control	MHC a3	scFv
Mean	53.4015	74.3324	86.6792
S.E.M.	4.9745	8.82965	8.45747
S.D.	14.07	23.361	23.9213
Variance	197.965	545.738	572.23
Sum	427.212	520.327	693.433
N	8	7	8
Sum(x^2)	24199.5	41951.6	64111.9
Sum^2/N	22813.7	38677.1	60106.3
SS	1385.76	3274.43	4005.61
Total Sum	1640.97
Total N	23
CF	117078
Bartlett's Test for Homogeneity of Variance
Df	Test Statistic		P
2	2.01663	N.S. (P>0.05)	0.364832
ANOVA Table
Factor	SS	Df	Ms	F(cal)		P(F<=F(cal))	F(0.05)
A (Between Groups)	4519.33	2	2259.67	5.21514	* (P<=0.05)	0.0150397	3.49283
R(A) (Within Groups)	8665.8	20	433.29
AR (Total)	13185.1	22
Tukey-Kramer Test: Pairwise Comparisons for One-Way Layout Design
	Control	MHC a3	scFv
Mean	53.4015	74.3324	86.6792
S.E.M.	4.9745	8.82965	8.45747
S.D.	14.07	23.361	23.9213
Variance	197.965	545.738	572.23
Sum	427.212	520.327	693.433
N	8	7	8
Sum(x^2)	24199.5	41951.6	64111.9
Sum^2/N	22813.7	38677.1	60106.3
SS	1385.76	3274.43	4005.61
Total Sum	1640.97
Total N	23
Errors Estimates
SS(E)	8665.8
Df(E)	20
Var(E)	433.29
SE(E)	20.8156
t-Table	Upper Right: tij; Lower Left: Upper Probability (Studentized Range Distribution)
	Control		MHC a3		scFv
Control			1.94289	N.S. (P>0.05)	3.19738	* (P<=0.05)
MHC a3	0.152681				1.14607	N.S. (P>0.05)
scFv	0.0120188		0.497768

## Sheet: FigS4
Absorbance at 280 nm [-]
ApoE NTD-scFv		ApoE NTD-scFv+DMPC
Flow volume [mL]	Absorbance at 280 nm [-]	Flow volume [mL]	Absorbance at 280 nm [-]
0	0	0	0
0.17	-0.01	0.17	-0.02
0.33	0.01	0.33	-0.02
0.5	-0.01	0.5	-0.03
0.67	-0.02	0.67	-0.04
0.83	-0.01	0.83	-0.04
1	-0.01	1	-0.03
1.17	-0.02	1.17	-0.04
1.33	-0.03	1.33	-0.04
1.5	-0.02	1.5	-0.04
1.67	-0.03	1.67	-0.05
1.83	-0.03	1.83	-0.04
2	-0.03	2	-0.05
2.17	-0.03	2.17	-0.06
2.33	-0.04	2.33	-0.06
2.5	-0.04	2.5	-0.06
2.67	-0.04	2.67	-0.05
2.83	-0.03	2.83	-0.04
3	-0.05	3	-0.06
3.17	-0.05	3.17	-0.05
3.33	-0.06	3.33	-0.06
3.5	-0.05	3.5	-0.07
3.67	-0.06	3.67	-0.06
3.83	-0.07	3.83	-0.06
4	-0.06	4	-0.06
4.17	-0.06	4.17	-0.06
4.33	-0.07	4.33	-0.07
4.5	-0.06	4.5	-0.07
4.67	-0.05	4.67	-0.07
4.83	-0.05	4.83	-0.06
5	-0.07	5	-0.06
5.17	-0.08	5.17	-0.07
5.33	-0.07	5.33	-0.07
5.5	-0.08	5.5	-0.06
5.67	-0.08	5.67	-0.07
5.83	-0.09	5.83	-0.07
6	-0.09	6	-0.07
6.17	-0.09	6.17	-0.07
6.33	-0.08	6.33	-0.07
6.5	-0.08	6.5	-0.08
6.67	-0.08	6.67	-0.07
6.83	-0.08	6.83	-0.08
7	-0.09	7	-0.08
7.17	-0.08	7.17	-0.08
7.33	-0.09	7.33	-0.08
7.5	-0.08	7.5	-0.08
7.67	-0.08	7.67	-0.08
7.83	-0.09	7.83	-0.08
8	-0.09	8	-0.08
8.17	-0.09	8.17	-0.07
8.33	-0.09	8.33	-0.08
8.5	-0.08	8.5	-0.09
8.67	-0.08	8.67	-0.07
8.83	-0.09	8.83	-0.07
9	-0.08	9	-0.07
9.17	-0.09	9.17	-0.06
9.33	-0.07	9.33	-0.06
9.5	-0.08	9.5	-0.07
9.67	-0.09	9.67	-0.07
9.83	-0.08	9.83	-0.07
10	-0.08	10	-0.06
10.17	-0.07	10.17	-0.06
10.33	-0.1	10.33	-0.07
10.5	-0.08	10.5	-0.06
10.67	-0.08	10.67	-0.07
10.83	-0.09	10.83	-0.07
11	-0.1	11	-0.06
11.17	-0.09	11.17	-0.07
11.33	-0.1	11.33	-0.06
11.5	-0.1	11.5	-0.05
11.67	-0.08	11.67	-0.06
11.83	-0.09	11.83	-0.06
12	-0.09	12	-0.05
12.17	-0.08	12.17	-0.06
12.33	-0.08	12.33	-0.05
12.5	-0.09	12.5	-0.05
12.67	-0.1	12.67	-0.05
12.83	-0.08	12.83	-0.05
13	-0.09	13	-0.04
13.17	-0.08	13.17	-0.03
13.33	-0.08	13.33	-0.05
13.5	-0.09	13.5	-0.05
13.67	-0.08	13.67	-0.04
13.83	-0.09	13.83	-0.03
14	-0.08	14	-0.03
14.17	-0.08	14.17	-0.04
14.33	-0.08	14.33	-0.03
14.5	-0.07	14.5	-0.03
14.67	-0.09	14.67	-0.04
14.83	-0.07	14.83	-0.03
15	-0.08	15	-0.02
15.17	-0.08	15.17	-0.03
15.33	-0.07	15.33	-0.02
15.5	-0.07	15.5	-0.03
15.67	-0.08	15.67	-0.01
15.83	-0.07	15.83	-0.02
16	-0.08	16	-0.01
16.17	-0.08	16.17	-0.02
16.33	-0.06	16.33	-0.02
16.5	-0.06	16.5	-0.02
16.67	-0.06	16.67	-0.02
16.83	-0.05	16.83	-0.01
17	-0.06	17	-0.01
17.17	-0.07	17.17	-0.01
17.33	-0.06	17.33	-0.01
17.5	-0.06	17.5	-0.02
17.67	-0.06	17.67	-0.02
17.83	-0.06	17.83	-0.03
18	-0.05	18	-0.01
18.17	-0.06	18.17	-0.01
18.33	-0.06	18.33	-0.01
18.5	-0.05	18.5	-0.01
18.67	-0.04	18.67	-0.01
18.83	-0.05	18.83	-0.03
19	-0.06	19	-0.02
19.17	-0.05	19.17	-0.01
19.33	-0.06	19.33	0.01
19.5	-0.06	19.5	-0.01
19.67	-0.04	19.67	-0.01
19.83	-0.05	19.83	0
20	-0.04	20	0
20.17	-0.04	20.17	0.01
20.33	-0.04	20.33	0.01
20.5	-0.05	20.5	0
20.67	-0.05	20.67	0
20.83	-0.05	20.83	0
21	-0.04	21	0.01
21.17	-0.04	21.17	0.02
21.33	-0.03	21.33	0
21.5	-0.04	21.5	0.02
21.67	-0.02	21.67	0.02
21.83	-0.04	21.83	0.03
22	-0.03	22	0.02
22.17	-0.04	22.17	0.03
22.33	-0.03	22.33	0.02
22.5	-0.03	22.5	0.03
22.67	-0.04	22.67	0.02
22.83	-0.02	22.83	0.02
23	-0.02	23	0.02
23.17	-0.04	23.17	0.03
23.33	-0.02	23.33	0.03
23.5	-0.01	23.5	0.03
23.67	-0.02	23.67	0.02
23.83	-0.04	23.83	0.04
24	-0.01	24	0.03
24.17	-0.02	24.17	0.04
24.33	-0.02	24.33	0.03
24.5	-0.01	24.5	0.02
24.67	-0.01	24.67	0.02
24.83	-0.01	24.83	0.03
25	-0.01	25	0.03
25.17	-0.01	25.17	0.03
25.33	-0.01	25.33	0.03
25.5	-0.01	25.5	0.02
25.67	-0.02	25.67	0.03
25.83	0	25.83	0.03
26	0	26	0.04
26.17	0	26.17	0.02
26.33	0	26.33	0.03
26.5	-0.01	26.5	0.03
26.67	0.01	26.67	0.04
26.83	0.01	26.83	0.04
27	0.01	27	0.03
27.17	0.01	27.17	0.03
27.33	0	27.33	0.04
27.5	0	27.5	0.02
27.67	0.01	27.67	0.03
27.83	0	27.83	0.03
28	0.01	28	0.03
28.17	0.01	28.17	0.04
28.33	0.01	28.33	0.04
28.5	0.02	28.5	0.03
28.67	0.02	28.67	0.04
28.83	0.01	28.83	0.04
29	0.02	29	0.06
29.17	0.02	29.17	0.05
29.33	0.02	29.33	0.07
29.5	0.03	29.5	0.05
29.67	0.02	29.67	0.05
29.83	0.02	29.83	0.07
30	0.04	30	0.07
30.17	0.01	30.17	0.06
30.33	0.02	30.33	0.07
30.5	0.02	30.5	0.07
30.67	0.02	30.67	0.08
30.83	0.03	30.83	0.07
31	0.04	31	0.07
31.17	0.03	31.17	0.07
31.33	0.03	31.33	0.08
31.5	0.02	31.5	0.09
31.67	0.03	31.67	0.09
31.83	0.03	31.83	0.08
32	0.04	32	0.1
32.17	0.05	32.17	0.09
32.33	0.05	32.33	0.09
32.5	0.04	32.5	0.09
32.67	0.05	32.67	0.1
32.83	0.05	32.83	0.09
33	0.06	33	0.09
33.17	0.05	33.17	0.09
33.33	0.05	33.33	0.09
33.5	0.05	33.5	0.1
33.67	0.06	33.67	0.09
33.83	0.05	33.83	0.09
34	0.07	34	0.09
34.17	0.07	34.17	0.08
34.33	0.05	34.33	0.08
34.5	0.07	34.5	0.09
34.67	0.06	34.67	0.09
34.83	0.06	34.83	0.09
35	0.07	35	0.09
35.17	0.07	35.17	0.09
35.33	0.06	35.33	0.09
35.5	0.06	35.5	0.09
35.67	0.07	35.67	0.09
35.83	0.06	35.83	0.1
36	0.07	36	0.09
36.17	0.07	36.17	0.1
36.33	0.07	36.33	0.11
36.5	0.08	36.5	0.11
36.67	0.07	36.67	0.12
36.83	0.08	36.83	0.12
37	0.06	37	0.16
37.17	0.08	37.17	0.17
37.33	0.08	37.33	0.23
37.5	0.09	37.5	0.26
37.67	0.08	37.67	0.32
37.83	0.11	37.83	0.38
38	0.11	38	0.44
38.17	0.12	38.17	0.55
38.33	0.14	38.33	0.67
38.5	0.15	38.5	0.83
38.67	0.18	38.67	1.02
38.83	0.21	38.83	1.38
39	0.24	39	1.72
39.17	0.31	39.17	2.2
39.33	0.38	39.33	2.83
39.5	0.49	39.5	3.61
39.67	0.64	39.67	4.48
39.83	0.85	39.83	5.25
40	1.12	40	6.42
40.17	1.4	40.17	7.15
40.33	1.71	40.33	7.87
40.5	2.05	40.5	8.67
40.67	2.39	40.67	9.31
40.83	2.73	40.83	9.95
41	3.04	41	10.21
41.17	3.37	41.17	10.88
41.33	3.67	41.33	10.97
41.5	3.94	41.5	11.08
41.67	4.23	41.67	11.38
41.83	4.59	41.83	11.46
42	4.92	42	11.65
42.17	5.27	42.17	11.48
42.33	5.67	42.33	11.71
42.5	6.03	42.5	11.41
42.67	6.28	42.67	11.07
42.83	6.48	42.83	10.87
43	6.59	43	10.33
43.17	6.55	43.17	9.84
43.33	6.34	43.33	9.15
43.5	6.11	43.5	8.7
43.67	5.72	43.67	8
43.83	5.26	43.83	7.33
44	4.88	44	6.96
44.17	4.46	44.17	6.36
44.33	4.1	44.33	5.88
44.5	3.71	44.5	5.43
44.67	3.44	44.67	5.23
44.83	3.16	44.83	4.8
45	2.89	45	4.44
45.17	2.76	45.17	4.36
45.33	2.55	45.33	4.03
45.5	2.4	45.5	3.81
45.67	2.26	45.67	3.61
45.83	2.19	45.83	3.63
46	2.05	46	3.43
46.17	1.92	46.17	3.23
46.33	1.91	46.33	3.29
46.5	1.79	46.5	3.08
46.67	1.74	46.67	2.98
46.83	1.67	46.83	2.91
47	1.67	47	2.96
47.17	1.6	47.17	2.85
47.33	1.52	47.33	2.71
47.5	1.55	47.5	2.77
47.67	1.47	47.67	2.61
47.83	1.45	47.83	2.54
48	1.4	48	2.5
48.17	1.43	48.17	2.54
48.33	1.38	48.33	2.41
48.5	1.32	48.5	2.31
48.67	1.35	48.67	2.34
48.83	1.27	48.83	2.19
49	1.26	49	2.15
49.17	1.23	49.17	2.1
49.33	1.24	49.33	2.1
49.5	1.19	49.5	1.96
49.67	1.14	49.67	1.9
49.83	1.15	49.83	1.89
50	1.08	50	1.76
50.17	1.07	50.17	1.72
50.33	1.06	50.33	1.67
50.5	1.04	50.5	1.62
50.67	1	50.67	1.52
50.83	0.96	50.83	1.47
51	0.96	51	1.47
51.17	0.91	51.17	1.38
51.33	0.89	51.33	1.34
51.5	0.88	51.5	1.3
51.67	0.85	51.67	1.25
51.83	0.81	51.83	1.18
52	0.78	52	1.16
52.17	0.79	52.17	1.14
52.33	0.76	52.33	1.08
52.5	0.74	52.5	1.06
52.67	0.72	52.67	1.03
52.83	0.7	52.83	1.01
53	0.69	53	0.96
53.17	0.67	53.17	0.98
53.33	0.68	53.33	0.96
53.5	0.65	53.5	0.92
53.67	0.62	53.67	0.9
53.83	0.63	53.83	0.88
54	0.59	54	0.85
54.17	0.59	54.17	0.83
54.33	0.59	54.33	0.84
54.5	0.58	54.5	0.84
54.67	0.56	54.67	0.78
54.83	0.56	54.83	0.78
55	0.54	55	0.79
55.17	0.54	55.17	0.76
55.33	0.53	55.33	0.73
55.5	0.54	55.5	0.76
55.67	0.53	55.67	0.74
55.83	0.51	55.83	0.71
56	0.51	56	0.69
56.17	0.49	56.17	0.71
56.33	0.5	56.33	0.7
56.5	0.48	56.5	0.69
56.67	0.5	56.67	0.71
56.83	0.5	56.83	0.68
57	0.49	57	0.65
57.17	0.48	57.17	0.66
57.33	0.48	57.33	0.65
57.5	0.47	57.5	0.67
57.67	0.47	57.67	0.64
57.83	0.49	57.83	0.68
58	0.48	58	0.64
58.17	0.47	58.17	0.63
58.33	0.48	58.33	0.66
58.5	0.48	58.5	0.63
58.67	0.49	58.67	0.64
58.83	0.48	58.83	0.62
59	0.48	59	0.65
59.17	0.49	59.17	0.61
59.33	0.47	59.33	0.61
59.5	0.49	59.5	0.64
59.67	0.49	59.67	0.61
59.83	0.5	59.83	0.62
60	0.49	60	0.59
60.17	0.51	60.17	0.64
60.33	0.5	60.33	0.6
60.5	0.49	60.5	0.61
60.67	0.52	60.67	0.63
60.83	0.5	60.83	0.61
61	0.5	61	0.61
61.17	0.51	61.17	0.6
61.33	0.54	61.33	0.65
61.5	0.52	61.5	0.63
61.67	0.52	61.67	0.6
61.83	0.55	61.83	0.64
62	0.53	62	0.61
62.17	0.53	62.17	0.62
62.33	0.54	62.33	0.61
62.5	0.55	62.5	0.66
62.67	0.55	62.67	0.65
62.83	0.55	62.83	0.61
63	0.58	63	0.65
63.17	0.58	63.17	0.64
63.33	0.58	63.33	0.63
63.5	0.58	63.5	0.64
63.67	0.6	63.67	0.67
63.83	0.6	63.83	0.65
64	0.59	64	0.66
64.17	0.62	64.17	0.67
64.33	0.62	64.33	0.66
64.5	0.62	64.5	0.66
64.67	0.63	64.67	0.68
64.83	0.65	64.83	0.69
65	0.64	65	0.68
65.17	0.64	65.17	0.68
65.33	0.67	65.33	0.7
65.5	0.65	65.5	0.68
65.67	0.66	65.67	0.68
65.83	0.68	65.83	0.69
66	0.68	66	0.72
66.17	0.67	66.17	0.68
66.33	0.68	66.33	0.7
66.5	0.69	66.5	0.71
66.67	0.69	66.67	0.72
66.83	0.71	66.83	0.71
67	0.72	67	0.71
67.17	0.72	67.17	0.73
67.33	0.7	67.33	0.72
67.5	0.73	67.5	0.74
67.67	0.75	67.67	0.74
67.83	0.76	67.83	0.74
68	0.78	68	0.76
68.17	0.8	68.17	0.77
68.33	0.82	68.33	0.78
68.5	0.83	68.5	0.78
68.67	0.87	68.67	0.82
68.83	0.9	68.83	0.85
69	0.93	69	0.85
69.17	0.97	69.17	0.88
69.33	1	69.33	0.9
69.5	1.05	69.5	0.95
69.67	1.09	69.67	0.96
69.83	1.18	69.83	1.02
70	1.21	70	1.05
70.17	1.28	70.17	1.07
70.33	1.34	70.33	1.14
70.5	1.41	70.5	1.17
70.67	1.49	70.67	1.24
70.83	1.54	70.83	1.27
71	1.67	71	1.38
71.17	1.73	71.17	1.4
71.33	1.82	71.33	1.45
71.5	1.9	71.5	1.52
71.67	1.97	71.67	1.58
71.83	2.06	71.83	1.64
72	2.12	72	1.68
72.17	2.23	72.17	1.78
72.33	2.28	72.33	1.79
72.5	2.33	72.5	1.83
72.67	2.4	72.67	1.9
72.83	2.46	72.83	1.93
73	2.51	73	1.96
73.17	2.52	73.17	1.98
73.33	2.6	73.33	2.06
73.5	2.59	73.5	2.04
73.67	2.6	73.67	2.04
73.83	2.62	73.83	2.08
74	2.59	74	2.05
74.17	2.59	74.17	2.04
74.33	2.55	74.33	2.04
74.5	2.55	74.5	2.06
74.67	2.5	74.67	2.02
74.83	2.46	74.83	1.99
75	2.43	75	2
75.17	2.38	75.17	1.94
75.33	2.33	75.33	1.91
75.5	2.28	75.5	1.88
75.67	2.25	75.67	1.9
75.83	2.18	75.83	1.83
76	2.12	76	1.79
76.17	2.1	76.17	1.79
76.33	2.02	76.33	1.72
76.5	1.98	76.5	1.69
76.67	1.93	76.67	1.66
76.83	1.91	76.83	1.67
77	1.85	77	1.62
77.17	1.79	77.17	1.56
77.33	1.77	77.33	1.58
77.5	1.72	77.5	1.51
77.67	1.67	77.67	1.49
77.83	1.65	77.83	1.48
78	1.65	78	1.48
78.17	1.6	78.17	1.44
78.33	1.57	78.33	1.42
78.5	1.56	78.5	1.42
78.67	1.51	78.67	1.38
78.83	1.49	78.83	1.37
79	1.47	79	1.36
79.17	1.48	79.17	1.36
79.33	1.44	79.33	1.32
79.5	1.42	79.5	1.3
79.67	1.4	79.67	1.32
79.83	1.38	79.83	1.27
80	1.36	80	1.27
80.17	1.34	80.17	1.27
80.33	1.33	80.33	1.27
80.5	1.3	80.5	1.23
80.67	1.27	80.67	1.23
80.83	1.26	80.83	1.22
81	1.23	81	1.18
81.17	1.21	81.17	1.17
81.33	1.19	81.33	1.15
81.5	1.17	81.5	1.15
81.67	1.13	81.67	1.09
81.83	1.11	81.83	1.09
82	1.1	82	1.09
82.17	1.06	82.17	1.05
82.33	1.03	82.33	1.03
82.5	1.01	82.5	1
82.67	1	82.67	0.99
82.83	0.97	82.83	0.95
83	0.93	83	0.97
83.17	0.93	83.17	0.94
83.33	0.89	83.33	0.91
83.5	0.88	83.5	0.89
83.67	0.86	83.67	0.87
83.83	0.84	83.83	0.86
84	0.82	84	0.83
84.17	0.81	84.17	0.85
84.33	0.8	84.33	0.82
84.5	0.79	84.5	0.8
84.67	0.75	84.67	0.79
84.83	0.74	84.83	0.79
85	0.73	85	0.77
85.17	0.72	85.17	0.75
85.33	0.72	85.33	0.76
85.5	0.7	85.5	0.75
85.67	0.69	85.67	0.72
85.83	0.69	85.83	0.72
86	0.68	86	0.71
86.17	0.67	86.17	0.72
86.33	0.65	86.33	0.7
86.5	0.66	86.5	0.72
86.67	0.67	86.67	0.71
86.83	0.65	86.83	0.66
87	0.64	87	0.68
87.17	0.64	87.17	0.67
87.33	0.64	87.33	0.67
87.5	0.62	87.5	0.66
87.67	0.65	87.67	0.69
87.83	0.63	87.83	0.65
88	0.63	88	0.65
88.17	0.63	88.17	0.66
88.33	0.64	88.33	0.63
88.5	0.61	88.5	0.65
88.67	0.61	88.67	0.63
88.83	0.61	88.83	0.66
89	0.61	89	0.62
89.17	0.59	89.17	0.61
89.33	0.6	89.33	0.64
89.5	0.61	89.5	0.61
89.67	0.61	89.67	0.61
89.83	0.58	89.83	0.6
90	0.62	90	0.64
90.17	0.58	90.17	0.62
90.33	0.58	90.33	0.6
90.5	0.59	90.5	0.63
90.67	0.58	90.67	0.6
90.83	0.57	90.83	0.6
91	0.57	91	0.59
91.17	0.6	91.17	0.62
91.33	0.57	91.33	0.59
91.5	0.55	91.5	0.58
91.67	0.57	91.67	0.6
91.83	0.56	91.83	0.56
92	0.56	92	0.58
92.17	0.55	92.17	0.57
92.33	0.56	92.33	0.6
92.5	0.55	92.5	0.58
92.67	0.55	92.67	0.56
92.83	0.56	92.83	0.58
93	0.53	93	0.56
93.17	0.54	93.17	0.56
93.33	0.53	93.33	0.56
93.5	0.55	93.5	0.56
93.67	0.54	93.67	0.55
93.83	0.53	93.83	0.53
94	0.53	94	0.56
94.17	0.52	94.17	0.55
94.33	0.52	94.33	0.54
94.5	0.52	94.5	0.55
94.67	0.54	94.67	0.56
94.83	0.52	94.83	0.53
95	0.52	95	0.55
95.17	0.52	95.17	0.56
95.33	0.51	95.33	0.53
95.5	0.51	95.5	0.55
95.67	0.51	95.67	0.55
95.83	0.53	95.83	0.56
96	0.51	96	0.53
96.17	0.51	96.17	0.53
96.33	0.52	96.33	0.56
96.5	0.5	96.5	0.53
96.67	0.52	96.67	0.54
96.83	0.51	96.83	0.53
97	0.52	97	0.55
97.17	0.5	97.17	0.53
97.33	0.53	97.33	0.53
97.5	0.54	97.5	0.56
97.67	0.51	97.67	0.54
97.83	0.51	97.83	0.54
98	0.52	98	0.53
98.17	0.52	98.17	0.55
98.33	0.51	98.33	0.53
98.5	0.52	98.5	0.55
98.67	0.52	98.67	0.56
98.83	0.52	98.83	0.53
99	0.53	99	0.54
99.17	0.52	99.17	0.54
99.33	0.51	99.33	0.55
99.5	0.51	99.5	0.52
99.67	0.52	99.67	0.55
99.83	0.53	99.83	0.54
100	0.51	100	0.52
100.17	0.53	100.17	0.53
100.33	0.53	100.33	0.53
100.5	0.52	100.5	0.54
100.67	0.51	100.67	0.53
100.83	0.53	100.83	0.56
101	0.52	101	0.54
101.17	0.52	101.17	0.51
101.33	0.52	101.33	0.53
101.5	0.52	101.5	0.52
101.67	0.53	101.67	0.54
101.83	0.52	101.83	0.51
102	0.54	102	0.56
102.17	0.53	102.17	0.54
102.33	0.53	102.33	0.52
102.5	0.53	102.5	0.54
102.67	0.53	102.67	0.53
102.83	0.55	102.83	0.55
103	0.53	103	0.54
103.17	0.55	103.17	0.57
103.33	0.55	103.33	0.55
103.5	0.53	103.5	0.54
103.67	0.55	103.67	0.57
103.83	0.56	103.83	0.58
104	0.56	104	0.59
104.17	0.56	104.17	0.58
104.33	0.58	104.33	0.63
104.5	0.58	104.5	0.61
104.67	0.56	104.67	0.61
104.83	0.57	104.83	0.64
105	0.58	105	0.63
105.17	0.58	105.17	0.63
105.33	0.57	105.33	0.63
105.5	0.58	105.5	0.69
105.67	0.58	105.67	0.67
105.83	0.56	105.83	0.66
106	0.59	106	0.7
106.17	0.58	106.17	0.69
106.33	0.58	106.33	0.67
106.5	0.56	106.5	0.69
106.67	0.58	106.67	0.73
106.83	0.58	106.83	0.71
107	0.56	107	0.68
107.17	0.58	107.17	0.72
107.33	0.57	107.33	0.69
107.5	0.56	107.5	0.67
107.67	0.55	107.67	0.69
107.83	0.57	107.83	0.7
108	0.56	108	0.69
108.17	0.56	108.17	0.67
108.33	0.56	108.33	0.67
108.5	0.56	108.5	0.67
108.67	0.55	108.67	0.65
108.83	0.56	108.83	0.68
109	0.56	109	0.66
109.17	0.56	109.17	0.64
109.33	0.55	109.33	0.64
109.5	0.55	109.5	0.64
109.67	0.55	109.67	0.65
109.83	0.54	109.83	0.62
110	0.55	110	0.65
110.17	0.56	110.17	0.64
110.33	0.55	110.33	0.61
110.5	0.54	110.5	0.6
110.67	0.55	110.67	0.63
110.83	0.54	110.83	0.6
111	0.54	111	0.59
111.17	0.53	111.17	0.6
111.33	0.53	111.33	0.61
111.5	0.53	111.5	0.58
111.67	0.53	111.67	0.57
111.83	0.53	111.83	0.59
112	0.52	112	0.57
112.17	0.51	112.17	0.57
112.33	0.52	112.33	0.57
112.5	0.53	112.5	0.57
112.67	0.52	112.67	0.55
112.83	0.52	112.83	0.56
113	0.52	113	0.56
113.17	0.51	113.17	0.55
113.33	0.52	113.33	0.56
113.5	0.52	113.5	0.53
113.67	0.52	113.67	0.54
113.83	0.5	113.83	0.52
114	0.51	114	0.53
114.17	0.51	114.17	0.52
114.33	0.5	114.33	0.51
114.5	0.5	114.5	0.51
114.67	0.49	114.67	0.5
114.83	0.49	114.83	0.51
115	0.48	115	0.5
115.17	0.49	115.17	0.5
115.33	0.48	115.33	0.47
115.5	0.48	115.5	0.47
115.67	0.47	115.67	0.47
115.83	0.46	115.83	0.46
116	0.47	116	0.46
116.17	0.46	116.17	0.44
116.33	0.47	116.33	0.47
116.5	0.46	116.5	0.43
116.67	0.43	116.67	0.43
116.83	0.45	116.83	0.43
117	0.44	117	0.42
117.17	0.45	117.17	0.42
117.33	0.44	117.33	0.42
117.5	0.45	117.5	0.42
117.67	0.43	117.67	0.4
117.83	0.44	117.83	0.39
118	0.44	118	0.4
118.17	0.45	118.17	0.39
118.33	0.44	118.33	0.39
118.5	0.45	118.5	0.39
118.67	0.46	118.67	0.39
118.83	0.45	118.83	0.39
119	0.44	119	0.37
119.17	0.45	119.17	0.38
119.33	0.44	119.33	0.37
119.5	0.46	119.5	0.37
119.67	0.44	119.67	0.36
119.83	0.46	119.83	0.37
120	0.46	120	0.35
120.17	0.44	120.17	0.34
120.33	0.45	120.33	0.36
120.5	0.43	120.5	0.35
120.67	0.45	120.67	0.34
120.83	0.45	120.83	0.34
121	0.45	121	0.35
121.17	0.44	121.17	0.34
121.33	0.44	121.33	0.33
121.5	0.46	121.5	0.34
121.67	0.43	121.67	0.33
121.83	0.43	121.83	0.33
122	0.43	122	0.32
122.17	0.44	122.17	0.33
122.33	0.43	122.33	0.33
122.5	0.43	122.5	0.32
122.67	0.43	122.67	0.33
122.83	0.41	122.83	0.31
123	0.43	123	0.3
123.17	0.41	123.17	0.3
123.33	0.42	123.33	0.31
123.5	0.42	123.5	0.29
123.67	0.41	123.67	0.3
123.83	0.42	123.83	0.29
124	0.41	124	0.28
124.17	0.4	124.17	0.29
124.33	0.41	124.33	0.28
124.5	0.41	124.5	0.29
124.67	0.42	124.67	0.27
124.83	0.4	124.83	0.27
125	0.42	125	0.29
125.17	0.43	125.17	0.29
125.33	0.41	125.33	0.29
125.5	0.41	125.5	0.28
125.67	0.42	125.67	0.3
125.83	0.41	125.83	0.29
126	0.4	126	0.3
126.17	0.41	126.17	0.3
126.33	0.41	126.33	0.29
126.5	0.41	126.5	0.29
126.67	0.42	126.67	0.31
126.83	0.43	126.83	0.31
127	0.42	127	0.28
127.17	0.42	127.17	0.31
127.33	0.42	127.33	0.31
127.5	0.41	127.5	0.3
127.67	0.41	127.67	0.3
127.83	0.42	127.83	0.31
128	0.42	128	0.31
128.17	0.42	128.17	0.3
128.33	0.43	128.33	0.32
128.5	0.43	128.5	0.31
128.67	0.41	128.67	0.3
128.83	0.41	128.83	0.31
129	0.41	129	0.29
129.17	0.4	129.17	0.31
129.33	0.4	129.33	0.31
129.5	0.41	129.5	0.32
129.67	0.39	129.67	0.3
129.83	0.4	129.83	0.3
130	0.39	130	0.3
130.17	0.38	130.17	0.29
130.33	0.38	130.33	0.3
130.5	0.37	130.5	0.28
130.67	0.38	130.67	0.29
130.83	0.38	130.83	0.28
131	0.37	131	0.27
131.17	0.38	131.17	0.28
131.33	0.37	131.33	0.27
131.5	0.37	131.5	0.27
131.67	0.36	131.67	0.27
131.83	0.37	131.83	0.27
132	0.36	132	0.26
132.17	0.36	132.17	0.26
132.33	0.36	132.33	0.27
132.5	0.36	132.5	0.26
132.67	0.36	132.67	0.25
132.83	0.34	132.83	0.25
133	0.36	133	0.25
133.17	0.34	133.17	0.25
133.33	0.34	133.33	0.25
133.5	0.35	133.5	0.24
133.67	0.35	133.67	0.24
133.83	0.35	133.83	0.23
134	0.34	134	0.23
134.17	0.34	134.17	0.23
134.33	0.33	134.33	0.22
134.5	0.34	134.5	0.23
134.67	0.33	134.67	0.24
134.83	0.33	134.83	0.22
135	0.35	135	0.21
135.17	0.33	135.17	0.22
135.33	0.33	135.33	0.22
135.5	0.33	135.5	0.22
135.67	0.32	135.67	0.22
135.83	0.32	135.83	0.22
136	0.32	136	0.21
136.17	0.32	136.17	0.21
136.33	0.32	136.33	0.2
136.5	0.34	136.5	0.2
136.67	0.33	136.67	0.2
136.83	0.33	136.83	0.2
137	0.32	137	0.22
137.17	0.32	137.17	0.22
137.33	0.33	137.33	0.21
137.5	0.31	137.5	0.2
137.67	0.31	137.67	0.21
137.83	0.31	137.83	0.2
138	0.31	138	0.19
138.17	0.31	138.17	0.19
138.33	0.31	138.33	0.18
138.5	0.32	138.5	0.18
138.67	0.31	138.67	0.18
138.83	0.31	138.83	0.19
139	0.31	139	0.19
139.17	0.3	139.17	0.17
139.33	0.3	139.33	0.19
139.5	0.31	139.5	0.19
139.67	0.31	139.67	0.2
139.83	0.31	139.83	0.17
140	0.31	140	0.18
140.17	0.3	140.17	0.18
140.33	0.29	140.33	0.17
140.5	0.29	140.5	0.19
140.67	0.29	140.67	0.17
140.83	0.29	140.83	0.18
141	0.29	141	0.18
141.17	0.3	141.17	0.2
141.33	0.29	141.33	0.19
141.5	0.29	141.5	0.2
141.67	0.3	141.67	0.18
141.83	0.3	141.83	0.17
142	0.28	142	0.18
142.17	0.3	142.17	0.17
142.33	0.29	142.33	0.18
142.5	0.29	142.5	0.18
142.67	0.29	142.67	0.17
142.83	0.29	142.83	0.18
143	0.29	143	0.17
143.17	0.29	143.17	0.17
143.33	0.28	143.33	0.17
143.5	0.29	143.5	0.17
143.67	0.28	143.67	0.16
143.83	0.29	143.83	0.19
144	0.29	144	0.18
144.17	0.29	144.17	0.17
144.33	0.28	144.33	0.17
144.5	0.27	144.5	0.17
144.67	0.29	144.67	0.17
144.83	0.28	144.83	0.18
145	0.28	145	0.16
145.17	0.28	145.17	0.16
145.33	0.28	145.33	0.17
145.5	0.27	145.5	0.15
145.67	0.29	145.67	0.16
145.83	0.27	145.83	0.16
146	0.28	146	0.15
146.17	0.28	146.17	0.16
146.33	0.27	146.33	0.16
146.5	0.27	146.5	0.15
146.67	0.27	146.67	0.14
146.83	0.28	146.83	0.15
147	0.26	147	0.15
147.17	0.27	147.17	0.15
147.33	0.27	147.33	0.15
147.5	0.28	147.5	0.15
147.67	0.26	147.67	0.14
147.83	0.27	147.83	0.13
148	0.27	148	0.13
148.17	0.27
148.33	0.24
148.5	0.26
148.67	0.27
148.83	0.25
149	0.26
149.17	0.27
149.33	0.26
149.5	0.28
149.67	0.27
149.83	0.26
150	0.26

## Sheet: FigS5
Alexa750-b2-m_5min
Alexa750-b2-m_10min											Alexa750-ApoE NTD-MHC a3+DMPC_15min											Alexa750-ApoE NTD-scFv+DMPC_10min											Alexa750-ApoE NTD-scFv+DMPC_3h10min
Alexa750-b2-m_20min											Alexa750-ApoE NTD-MHC a3+DMPC_20min											Alexa750-ApoE NTD-scFv+DMPC_20min											Alexa750-ApoE NTD-scFv+DMPC_3h10min_Brightfield
Alexa750-b2-m_30min											Alexa750-ApoE NTD-MHC a3+DMPC_30min											Alexa750-ApoE NTD-scFv+DMPC_30min
Alexa750-b2-m_40min											Alexa750-ApoE NTD-MHC a3+DMPC_40min											Alexa750-ApoE NTD-scFv+DMPC_40min
Alexa750-b2-m_50min											Alexa750-ApoE NTD-MHC a3+DMPC_50min											Alexa750-ApoE NTD-scFv+DMPC_50min
Alexa750-b2-m_60min											Alexa750-ApoE NTD-MHC a3+DMPC_60min											Alexa750-ApoE NTD-scFv+DMPC_60min
Alexa750-b2-m_60min_Brightfield											Alexa750-ApoE NTD-MHC a3+DMPC_60min_Brightfield											Alexa750-ApoE NTD-scFv+DMPC_60min_Brightfield
